# Supplementary material for: Three-component difluoroalkylamination of alkenes mediated by photoredox and iron cooperative catalysis
Source: Royal Society of Chemistry journal article supplement (doi:10.1039/c9ob01815h), 2019-01-01
Supplement: c9ob01815h1.pdf [file c9ob01815h1.pdf]

# **Three-Component Difluoroalkylation of Alkenes Mediated by Photoredox and Iron Cooperative Catalysis**

**Rui Xu,<sup>a</sup> Chun Cai<sup>\*ab</sup>**

<sup>a</sup> Chemical Engineering college, Nanjing University of Science and Technology, 200 Xiao Ling Wei Street, Nanjing, Jiangsu, People's Republic of China

<sup>b</sup> Key Laboratory of Organofluorine Chemistry, Shanghai Institute of Organic Chemistry, Chinese Academy of Sciences, 345 Lingling Lu, Shanghai 20032.

\* Corresponding Author Fax: (+86)-25-8431-5030; phone: (+86)-25-8431-5514; e-mail: c.cai@mail.njust.edu.cn

|                                 |    |
|---------------------------------|----|
| 1. General Information .....    | 2  |
| 2. Experimental procedures..... | 2  |
| 3. Characterization Data.....   | 3  |
| 4. Control experiments.....     | 11 |
| 5. NMR Spectra.....             | 14 |

## 1. General Information

All chemical reagents are obtained from commercial suppliers and used without further purification. All known compounds are characterized by  $^1\text{H}$  NMR,  $^{13}\text{C}$  NMR and  $^{19}\text{F}$  NMR and compared with previously reported data. All experiments were conducted with a schlenk tube. Analytical thin-layer chromatography are performed on glass plates precoated with silica gel impregnated with a fluorescent indicator (254 nm), and the plates are visualized by exposure to ultraviolet light. Mass spectra are taken on a Waters UPLC H-class LC-MS instrument in the electrospray ionization (ESI) mode. Only molecular ions ( $M + 1$ ) are given for the ESI-MS analysis.  $^1\text{H}$  NMR,  $^{13}\text{C}$  NMR and  $^{19}\text{F}$  NMR spectra are recorded on an AVANCE 500 Bruker spectrometer operating at 500 MHz, 126 MHz and 470 MHz in  $\text{CDCl}_3$ , respectively. Chemical shifts in ppm from tetramethylsilane as an internal standard in  $\text{CDCl}_3$ , integration, multiplicity (s = singlet, d = doublet, t = triplet, q = quartet, dd = doublet-doublet, m = multiplet, br = broad), coupling constants (Hz), and assignment.  $^{19}\text{F}$  NMR chemical shifts were determined relative to  $\text{CFCl}_3$  as inter standard.

## 2. Experimental Procedure

A 10 mL reaction vessel with a magnetic stirring bar was equipped with *fac*-Ir(ppy) $_3$  (1.3 mg, 0.002 mmol, 0.01 equiv),  $\text{FeCl}_2$  (5.1 mg, 0.04 mmol, 0.2 equiv) and  $\text{K}_2\text{CO}_3$  (83.0 mg, 0.6 mmol, 3 equiv). The tube was then evacuated and back-filled with argon (Ar) for 3 times. Subsequently, 1,2-dichloroethane (2 mL) was added followed by alkene **1** (0.2 mmol, 1.0 equiv), N-methyl anilines **2** (0.3 mmol, 1.5 equiv) and  $\text{BrCF}_2\text{COOEt}$  **3** (0.5 mmol, 2.5 equiv) via syringe under Ar. Once added, the Schlenk tube was sealed at atmospheric pressure of Ar (1 atm). The reaction was stirred and irradiated with a 5 W blue LED lamp at r.t. for 18 h. The resulting mixture was diluted with 3 mL EtOAc. The reaction mixture was extracted by EtOAc with three times and the combined organic phases were concentrated *in vacuo*. The residue was purified by silica gel flash column chromatography (petroleum ether/EtOAc = 98/2~98/5) to give the pure desired product.

### 3. Characterization Data

#### Ethyl 2,2-difluoro-4-(methyl(phenyl)amino)-4-phenylbutanoate (4a)

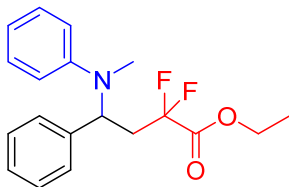

Following the general procedure, the title compound was obtained (61.9 mg, 93% yield, colorless oil). **<sup>1</sup>H NMR (500 MHz, CDCl<sub>3</sub>)** δ7.26 (d, J = 6.0 Hz, 5H), 7.08 (d, J = 5.5 Hz, 2H), 6.97 – 6.79 (m, 3H), 5.32 (d, J = 10.6 Hz, 1H), 4.04 – 3.96 (m, 1H), 3.90 – 3.81 (m, 1H), 3.26 – 3.14 (m, 1H), 2.63 (d, J = 11.3 Hz, 1H), 2.38 (s, 3H), 0.99 (t, J = 7.1 Hz, 3H); **<sup>13</sup>C NMR (126 MHz, CDCl<sub>3</sub>)** δ163.62 (t, J<sup>C-F</sup> = 31.5 Hz), 150.06 (s), 137.67 (s), 129.11 (s), 128.49 (s), 127.80 (s), 126.88 (s), 118.76 (s), 116.25 (dd, J<sup>C-F</sup> = 231.84, 258.3 Hz), 115.50 (s), 62.75 (s), 58.04 (dd, J<sup>C-F</sup> = 12.6, 5.04 Hz), 36.04 (t, J<sup>C-F</sup> = 23.94 Hz), 31.95 (s), 13.51 (s); **<sup>19</sup>F NMR (470 MHz, CDCl<sub>3</sub>)** -99.82 (d, J = 263.2 Hz, 1F), -109.21 (dd, J = 263.2, 28.2 Hz, 1F); **ESI-MS m/z**: 334.1540 [M+1]<sup>+</sup>.

#### Ethyl 2,2-difluoro-4-(methyl(phenyl)amino)-4-(p-tolyl)butanoate (4b)

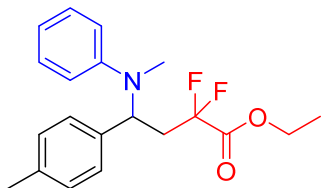

Following the general procedure, the title compound was obtained (62.5 mg, 90% yield, colorless oil). **<sup>1</sup>H NMR (500 MHz, CDCl<sub>3</sub>)** δ7.25 (d, J = 4.9 Hz, 2H), 7.07 (d, J = 7.7 Hz, 2H), 6.96 (d, J = 6.5 Hz, 2H), 6.87 (d, J = 5.8 Hz, 2H), 6.82 (s, 1H), 5.28 (d, J = 9.4 Hz, 1H), 3.99 (dd, J = 10.7, 7.1 Hz, 1H), 3.85 (dd, J = 10.7, 7.1 Hz, 1H), 3.25 – 3.11 (m, 1H), 2.60 (d, J = 10.2 Hz, 1H), 2.37 (s, 3H), 2.30 (s, 3H), 0.99 (t, J = 7.1 Hz, 3H); **<sup>13</sup>C NMR (126 MHz, CDCl<sub>3</sub>)** δ163.62 (t, J<sup>C-F</sup> = 31.5 Hz), 150.15 (s), 137.50 (s), 134.62 (s), 129.14 (s), 129.09 (s), 126.82 (s), 118.66 (s), 115.65 (dd, J<sup>C-F</sup> = 243.18, 15.12 Hz), 115.50 (s), 62.73 (s), 57.79 (dd, J<sup>C-F</sup> = 7.56, 3.78 Hz), 36.13 (t, J<sup>C-F</sup> = 23.94 Hz), 31.88 (s), 21.05 (s), 13.50 (s); **<sup>19</sup>F NMR (470 MHz, CDCl<sub>3</sub>)** δ-99.78 (d, J = 6.8 Hz), -109.26 (d, J = 28.0 Hz, 1F); **ESI-MS m/z**: 348.4058 [M+1]<sup>+</sup>.

#### Ethyl 2,2-difluoro-4-(4-methoxyphenyl)-4-(methyl(p-tolyl)amino)butanoate (4c)<sup>[1]</sup>

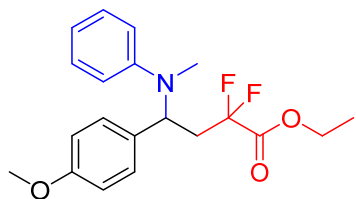

Following the general procedure, the title compound was obtained (64.6 mg, 89% yield, colorless oil). **<sup>1</sup>H NMR (500 MHz, CDCl<sub>3</sub>)** δ7.24 (dd, J = 7.9, 6.4 Hz, 2H), 6.98 (d, J = 8.6 Hz, 2H), 6.87 (d, J = 8.1 Hz, 2H), 6.81 (dd, J = 17.4, 8.0 Hz, 3H), 5.27 (d, J = 8.3 Hz, 1H), 3.99 (dd, J = 10.7, 7.2 Hz, 1H), 3.86 (dd, J = 10.7, 7.2 Hz, 1H), 3.77 (s, 3H), 3.23 – 3.11 (m, 1H), 2.58 (dd, J = 17.6, 3.6 Hz, 1H), 2.35 (s, 3H), 0.99 (t, J = 7.2 Hz, 3H); **<sup>13</sup>C NMR (126 MHz, CDCl<sub>3</sub>)** δ163.65 (t, J<sup>C-F</sup> = 31.5 Hz), 159.07 (s), 150.19 (s), 129.77 (s), 129.06 (s), 128.02 (s), 118.71 (s), 116.26 (dd, J<sup>C-F</sup> = 257.04, 245.7 Hz), 115.61 (s), 113.74 (s), 62.71 (s), 57.63 (dd, J = 9.1, 2.0 Hz), 55.25 (s), 36.19 (t, J<sup>C-F</sup> = 23.94 Hz), 31.71 (s), 13.50 (s); **<sup>19</sup>F NMR (470 MHz, CDCl<sub>3</sub>)** δ-99.79 (d, J = 12.0 Hz, 1F), -109.24 (d, J = 27.8 Hz, 1F); **ESI-MS** m/z: 364.4048 [M+1]<sup>+</sup>.

#### Ethyl 4-(4-chlorophenyl)-2,2-difluoro-4-(methyl(phenyl)amino)butanoate (4d)

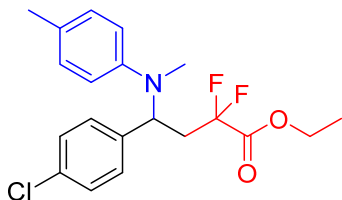

Following the general procedure, the title compound was obtained (62.4 mg, 85% yield, colorless oil). **<sup>1</sup>H NMR (500 MHz, CDCl<sub>3</sub>)** δ7.28 – 7.24 (m, 4H), 7.00 (d, J = 8.0 Hz, 2H), 6.92 – 6.81 (m, 3H), 5.27 (d, J = 11.1 Hz, 1H), 4.01 (dd, J = 10.7, 7.1 Hz, 1H), 3.89 (dd, J = 10.7, 7.2 Hz, 1H), 3.17 (dd, J = 26.6, 20.0 Hz, 1H), 2.58 (dd, J = 23.4, 10.4 Hz, 1H), 2.36 (s, 3H), 1.01 (t, J = 7.1 Hz, 3H); **<sup>13</sup>C NMR (126 MHz, CDCl<sub>3</sub>)** δ163.62 (t, J = 63 Hz), 150.06 (s), 137.67 (s), 129.18 (s), 128.66 (s), 128.20 (s), 125.56 (s), 118.76 (s), 116.26 (dd, J = 244.44, 231.84 Hz), 115.50 (s), 62.75 (s), 58.04 (dd, J = 12.6, 7.56 Hz), 36.04 (t, J = 23.94 Hz), 31.95 (s), 13.51 (s); **<sup>19</sup>F NMR (470 MHz, CDCl<sub>3</sub>)** δ-99.87 (d, J = 258.5 Hz), -109.31 (dd, J = 263.2, 23.5 Hz); **ESI-MS** m/z: 368.8208 [M+1]<sup>+</sup>.

#### Ethyl 4-(4-bromophenyl)-2,2-difluoro-4-(methyl(phenyl)amino)butanoate (4e)

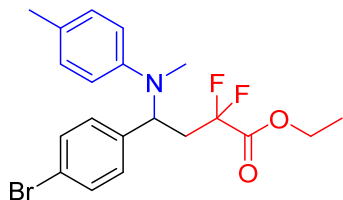

Following the general procedure, the title compound was obtained (72.3 mg, 88% yield, colorless oil). **<sup>1</sup>H NMR (500 MHz, CDCl<sub>3</sub>)** δ7.39 (d, J = 8.3 Hz, 2H), 7.25 (d, J = 9.0 Hz, 2H), 6.94 (d, J = 8.0 Hz, 2H), 6.90 – 6.81 (m, 3H), 5.25 (d, J = 9.6 Hz, 1H), 4.01 (dd, J = 10.7, 7.2 Hz, 1H), 3.89 (dd, J = 10.7, 7.1 Hz, 1H), 3.22 – 3.10 (m, 1H), 2.58 (dd, J = 23.3, 10.6 Hz, 1H), 2.37 (s, 3H),

1.01 (t, J = 7.1 Hz, 3H);  $^{13}\text{C}$  NMR (126 MHz,  $\text{CDCl}_3$ )  $\delta$ 163.53 (t, J = 63 Hz), 149.83 (s), 136.56 (s), 131.62 (s), 129.20 (s), 128.57 (s), 121.81 (s), 119.16 (s), 116.99 (dd, J = 246.96, 246.33 Hz), 115.71 (s), 62.84 (s), 57.86 (dd, J = 8.3, 4.0 Hz), 35.90 (t, J = 47.88 Hz), 31.93 (s), 13.53 (s);  $^{19}\text{F}$  NMR (470 MHz,  $\text{CDCl}_3$ )  $\delta$ -99.87 (d, J = 263.2 Hz, 1F), -109.29 (dd, J = 258.5, 23.5 Hz, 1F); ESI-MS m/z: 426.0802  $[\text{M}+1]^+$ .

**Ethyl 2,2-difluoro-4-(4-fluorophenyl)-4-(methyl(phenyl)amino)butanoate (4f)**

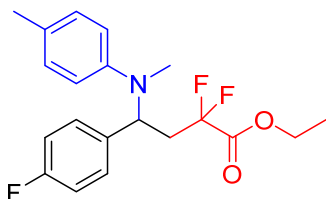

Following the general procedure, the title compound was obtained (64.2 mg, 88% yield, colorless oil).  $^1\text{H}$  NMR (500 MHz,  $\text{CDCl}_3$ )  $\delta$ 7.27 (d, J = 6.9 Hz, 2H), 7.06 – 7.01 (m, 2H), 6.95 (t, J = 8.7 Hz, 2H), 6.85 (dd, J = 17.7, 7.8 Hz, 3H), 5.28 (d, J = 9.9 Hz, 1H), 4.01 (dd, J = 10.7, 7.1 Hz, 1H), 3.88 (dd, J = 10.7, 7.2 Hz, 1H), 3.18 (dd, J = 26.7, 20.4 Hz, 1H), 2.59 (dd, J = 23.2, 10.3 Hz, 1H), 2.36 (s, 3H), 1.00 (t, J = 7.2 Hz, 3H);  $^{13}\text{C}$  NMR (126 MHz,  $\text{CDCl}_3$ )  $\delta$ 163.56 (t, J = 64.26 Hz), 162.24 (d, J = 246.96 Hz), 149.95 (s), 134.48 (d, J = 278.46 Hz), 129.17 (s), 128.50 (d, J = 8.0 Hz), 119.06 (s), 115.70 (s), 115.59 (dd, J = 257.04, 126 Hz), 115.43 (s), 115.26 (s), 62.80 (s), 57.70 (dd, J = 6.8, 3.0 Hz), 36.32 (s), 36.13 (s), 35.94 (s), 31.77 (s), 13.52 (s);  $^{19}\text{F}$  NMR (470 MHz,  $\text{CDCl}_3$ )  $\delta$ -99.85 (d, J = 264.0 Hz, 1F), -109.33 (dd, J = 261.1, 26.8 Hz, 1F), -114.42 (s, 1F); ESI-MS m/z: 366.3962  $[\text{M}+1]^+$ .

**Ethyl 4-(4-cyanophenyl)-2,2-difluoro-4-(methyl(phenyl)amino)butanoate (4g)**

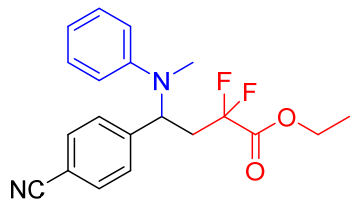

Following the general procedure, the title compound was obtained (55.1 mg, 77% yield, colorless oil).  $^1\text{H}$  NMR (500 MHz,  $\text{CDCl}_3$ )  $\delta$ 7.58 (d, J = 8.2 Hz, 2H), 7.29 (s, 1H), 7.25 (s, 1H), 7.19 (d, J = 8.2 Hz, 2H), 6.85 (d, J = 8.4 Hz, 3H), 5.33 (d, J = 14.8 Hz, 1H), 4.03 (dd, J = 10.7, 7.2 Hz, 1H), 3.91 (dd, J = 10.7, 7.2 Hz, 1H), 3.19 (dd, J = 26.1, 19.1 Hz, 1H), 2.62 (dd, J = 26.5, 14.5 Hz, 1H), 2.39 (s, 3H), 1.02 (t, J = 7.2 Hz, 3H);  $^{13}\text{C}$  NMR (126 MHz,  $\text{CDCl}_3$ )  $\delta$ 163.43 (t, J = 32.13 Hz), 149.48 (s), 143.02 (s), 132.35 (s), 129.32 (s), 127.58 (s), 119.48 (s), 118.44 (s), 115.61 (s), 115.48 (dd, J = 250.4, 243.18 Hz), 111.84 (s), 60.41 (s), 58.09 (dd, J = 8.8, 2.1 Hz), 35.71 (t, J = 24.57 Hz), 32.15 (s), 14.22 (s);  $^{19}\text{F}$  NMR (470 MHz,  $\text{CDCl}_3$ )  $\delta$ -99.99 (d, J = 263.2 Hz, 1F), -109.22 (dd, J = 26.4, 10.7 Hz, 1F); ESI-MS m/z: 359.3888  $[\text{M}+1]^+$ .

**Ethyl 4-(4-(tert-butyl)phenyl)-2,2-difluoro-4-(methyl(phenyl)amino) butanoate (4h)**

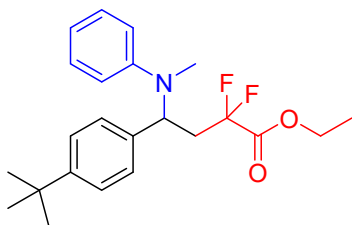

Following the general procedure, the title compound was obtained (73.9 mg, 95% yield, colorless oil). **<sup>1</sup>H NMR (500 MHz, CDCl<sub>3</sub>)** δ7.28 (d, J = 8.4 Hz, 2H), 7.24 (d, J = 8.5 Hz, 2H), 7.01 (d, J = 8.3 Hz, 2H), 6.87 (d, J = 8.2 Hz, 2H), 6.81 (t, J = 7.3 Hz, 1H), 5.31 (d, J = 8.6 Hz, 1H), 3.98 (dd, J = 10.7, 7.2 Hz, 1H), 3.84 (dd, J = 10.7, 7.2 Hz, 1H), 3.18 (dd, J = 26.7, 20.7 Hz, 1H), 2.62 (dd, J = 23.8, 10.1 Hz, 1H), 2.40 (s, 3H), 1.28 (s, 9H), 0.98 (t, J = 7.2 Hz, 3H); **<sup>13</sup>C NMR (126 MHz, CDCl<sub>3</sub>)** δ163.67 (t, J = 31.5 Hz), 150.66 (s), 150.14 (s), 134.76 (s), 129.06 (s), 126.54 (s), 125.34 (s), 118.50 (s), 116.27 (dd, J = 257.04, 244.44 Hz), 115.27 (s), 62.72 (s), 57.45 (dd, J = 15.12, 6.3 Hz), 36.15 (t, J = 23.94 Hz), 34.50 (s), 31.95 (s), 31.30 (s), 13.48 (s); **<sup>19</sup>F NMR (470 MHz, CDCl<sub>3</sub>)** δ-99.86 (dd, J = 12.9, 5.9 Hz, 1F), -109.11 (dd, J = 27.8, 9.9 Hz, 1F); **ESI-MS m/z**: 390.4868 [M+1]<sup>+</sup>.

**Ethyl 2,2-difluoro-4-(methyl(phenyl)amino)-4-(m-tolyl)butanoate (4i)**

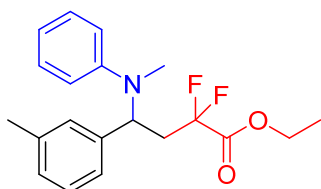

Following the general procedure, the title compound was obtained (59.7 mg, 86% yield, colorless oil). **<sup>1</sup>H NMR (500 MHz, CDCl<sub>3</sub>)** δ7.26 (t, J = 3.7 Hz, 2H), 7.15 (t, J = 7.6 Hz, 1H), 7.06 (d, J = 7.5 Hz, 1H), 6.90 – 6.83 (m, 4H), 6.81 (t, J = 7.2 Hz, 1H), 5.29 (d, J = 8.9 Hz, 1H), 3.99 (dd, J = 10.7, 7.2 Hz, 1H), 3.85 (dd, J = 10.7, 7.1 Hz, 1H), 3.18 (dd, J = 27.1, 19.9 Hz, 1H), 2.65 – 2.58 (m, 1H), 2.40 (s, 3H), 2.29 (s, 3H), 1.00 (t, J = 7.1 Hz, 3H); **<sup>13</sup>C NMR (126 MHz, CDCl<sub>3</sub>)** δ163.64 (t, J = 31.5 Hz), 150.08 (s), 138.13 (s), 137.73 (s), 129.07 (s), 128.43 (d, J = 18.6 Hz), 127.50 (s), 124.03 (s), 118.57 (s), 116.25 (dd, J = 255.78, 244.44 Hz), 115.34 (s), 62.74 (s), 57.77 (dd, J = 14.2, 6.9 Hz), 36.12 (t, J = 23.94 Hz), 31.96 (s), 21.58 (s), 13.51 (s); **<sup>19</sup>F NMR (470 MHz, CDCl<sub>3</sub>)** δ-99.87 (d, J = 263.2 Hz, 1F), -109.04 (dd, J = 258.5, 9.4 Hz, 1F); **ESI-MS m/z**: 348.4058 [M+1]<sup>+</sup>.

**Ethyl 4-(3-bromophenyl)-2,2-difluoro-4-(methyl(phenyl)amino)butanoate (4j)**

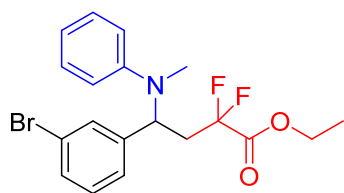

Following the general procedure, the title compound was obtained (67.4 mg, 82% yield, colorless oil). **<sup>1</sup>H NMR (500 MHz, CDCl<sub>3</sub>)** δ7.40 (d, J = 7.9 Hz, 1H), 7.28 (d, J = 11.0 Hz, 3H), 7.14 (t, J = 7.8 Hz, 1H), 7.01 (s, 1H), 6.88 (s, 3H), 5.25 (d, J = 9.0 Hz, 1H), 4.02 (dd, J = 10.7, 7.1 Hz, 1H), 3.89 (dd, J = 10.7, 7.2 Hz, 1H), 3.16 (dd, J = 19.4, 11.2 Hz, 1H), 2.62 (dd, J = 19.4, 9.7 Hz, 1H), 2.43 (s, 3H), 1.03 (t, J = 7.1 Hz, 3H); **<sup>13</sup>C NMR (126 MHz, CDCl<sub>3</sub>)** δ163.49 (t, J = 32.13 Hz), 149.72 (s), 140.16 (s), 130.94 (s), 130.09 (s), 129.73 (s), 129.20 (s), 125.73 (s), 122.69 (s), 119.24 (dd, J = 254.3, 248.5 Hz), 119.10 (s), 115.51 (s), 60.43 (s), 57.72 (dd, J = 10.4, 2.8 Hz), 35.93 (t, J = 23.94 Hz), 32.03 (s), 13.53 (s); **<sup>19</sup>F NMR (470 MHz, CDCl<sub>3</sub>)** δ -100.06 (dd, J = 12.3, 6.7 Hz, 1F), -108.94 (dd, J = 26.6, 10.2 Hz, 1F); **ESI-MS m/z**: 412.0645 [M+1]<sup>+</sup>.

#### Ethyl 4-(3-chlorophenyl)-2,2-difluoro-4-(methyl(phenyl)amino)butanoate (4k)

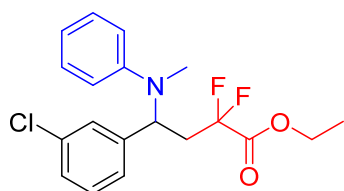

Following the general procedure, the title compound was obtained (63.9 mg, 87% yield, colorless oil). **<sup>1</sup>H NMR (500 MHz, CDCl<sub>3</sub>)** δ7.26 (t, J = 7.8 Hz, 3H), 7.20 (t, J = 7.7 Hz, 1H), 7.09 (s, 1H), 6.95 (d, J = 5.8 Hz, 1H), 6.86 (dd, J = 13.9, 6.9 Hz, 3H), 5.27 (d, J = 9.7 Hz, 1H), 4.01 (dd, J = 10.8, 7.2 Hz, 1H), 3.89 (dd, J = 10.7, 7.2 Hz, 1H), 3.16 (dd, J = 33.1, 25.9 Hz, 1H), 2.61 (dd, J = 21.4, 13.5 Hz, 1H), 2.42 (s, 3H), 1.02 (t, J = 7.1 Hz, 3H); **<sup>13</sup>C NMR (126 MHz, CDCl<sub>3</sub>)** δ163.49 (d, J = 31.5 Hz), 149.67 (s), 139.82 (s), 134.50 (s), 129.82 (s), 129.22 (s), 128.04 (s), 126.92 (s), 125.28 (s), 119.16 (s), 115.91 (dd, J = 257.04, 248.22 Hz), 115.59 (s), 62.86 (s), 57.85 (dd, J = 7.4, 4.5 Hz), 35.96 (t, J = 23.94 Hz), 32.14 (s), 13.53 (s); **<sup>19</sup>F NMR (470 MHz, CDCl<sub>3</sub>)** δ -100.02 (d, J = 258.5 Hz, 1F), -109.04 (dd, J = 272.6, 18.8 Hz, 1F); **ESI-MS m/z**: 368.1151 [M+1]<sup>+</sup>.

#### Ethyl 2,2-difluoro-4-(methyl(phenyl)amino)-4-(o-tolyl)butanoate (4l)

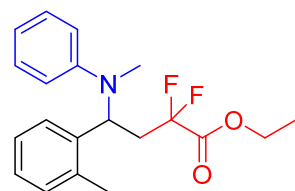

Following the general procedure, the title compound was obtained (59.0 mg, 85% yield, colorless oil). **<sup>1</sup>H NMR (500 MHz, CDCl<sub>3</sub>)** δ7.29 (s, 1H), 7.24 (d, J = 7.8 Hz, 2H), 7.19 (dd, J = 14.2, 7.4 Hz, 2H), 7.13 (d, J = 7.0 Hz, 1H), 6.89 (d, J = 6.9 Hz, 2H), 6.80 (s, 1H), 5.41 – 5.34 (m, 1H), 3.95 (dd, J = 10.7, 7.2

Hz, 1H), 3.88 (dd, J = 10.7, 7.2 Hz, 1H), 3.06 (dd, J = 33.2, 23.3 Hz, 1H), 2.65 (dd, J = 30.8, 22.0 Hz, 1H), 2.48 (s, 3H), 1.07 (t, J = 7.2 Hz, 3H); **<sup>13</sup>C NMR (126 MHz, CDCl<sub>3</sub>)** δ 163.71 (t, J = 28.98 Hz), 149.68 (s), 137.72 (s), 136.14 (s), 131.18 (s), 129.13 (s), 127.71 (s), 126.92 (s), 125.47 (s), 114.96 (s), 112.38 (dd, J = 256.2, 243.6 Hz), 60.43 (s), 54.31 (dd, J = 10.4, 5.1 Hz), 35.90 (t, J = 21.1 Hz), 31.94 (s), 21.09 (s), 14.23 (s); **<sup>19</sup>F NMR (470 MHz, CDCl<sub>3</sub>)** δ -100.84 (d, J = 263.2 Hz, 1F), -107.02 (dd, J = 263.2, 4.7 Hz, 1F); **ESI-MS** m/z: 348.1697 [M+1]<sup>+</sup>.

**Ethyl 4-(2-chlorophenyl)-2,2-difluoro-4-(methyl(phenyl)amino) butanoate (4m)**

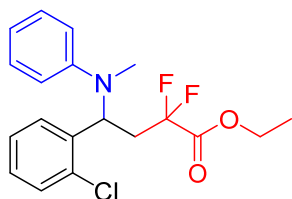

Following the general procedure, the title compound was obtained (60.9 mg, 83% yield, colorless oil). **<sup>1</sup>H NMR (500 MHz, CDCl<sub>3</sub>)** δ 7.37 (dd, J = 7.6, 1.4 Hz, 1H), 7.32 (d, J = 7.3 Hz, 1H), 7.23 (d, J = 7.3 Hz, 3H), 6.87 (d, J = 8.2 Hz, 2H), 6.79 (t, J = 7.2 Hz, 1H), 6.74 – 6.59 (m, 1H), 5.62 (dd, J = 9.4, 5.1 Hz, 1H), 4.03 (dd, J = 10.7, 7.1 Hz, 1H), 3.93 (dd, J = 10.7, 7.2 Hz, 1H), 3.03 (dd, J = 25.6, 10.8 Hz, 1H), 2.83 (dd, J = 30.8, 22.0 Hz, 1H), 2.66 (s, 3H), 1.08 (t, J = 7.2 Hz, 3H); **<sup>13</sup>C NMR (126 MHz, CDCl<sub>3</sub>)** δ 163.70 (t, J = 25.83 Hz), 149.81 (s), 136.19 (s), 134.49 (s), 130.45 (s), 128.97 (s), 128.8 (s), 128.41 (s), 126.53 (s), 115.09 (s), 114.86 (dd, J = 256.9, 245.7 Hz), 62.96 (s), 54.58 (dd, J = 7.1, 2.5 Hz), 36.18 (t, J = 24.57 Hz), 30.92 (s), 13.59 (s); **<sup>19</sup>F NMR (470 MHz, CDCl<sub>3</sub>)** δ -101.30 (d, J = 263.2 Hz, 1F), -107.16 (dd, J = 21.4, 13.3 Hz, 1F); **ESI-MS** m/z: 368.1151 [M+1]<sup>+</sup>.

**Ethyl 2,2-difluoro-4-(methyl(phenyl)amino)-4-(perfluorophenyl) butanoate (4n)**

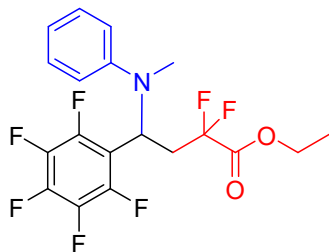

Following the general procedure, the title compound was obtained (74.4 mg, 88% yield, colorless oil). **<sup>1</sup>H NMR (500 MHz, CDCl<sub>3</sub>)** δ 7.08 (d, J = 5.3 Hz, 2H), 6.88 (d, J = 7.2 Hz, 2H), 6.85 – 6.81 (m, 1H), 5.32 (d, J = 10.3 Hz, 1H), 4.00 (dd, J = 10.6, 7.2 Hz, 1H), 3.86 (dd, J = 10.6, 7.2 Hz, 1H), 3.21 (dd, J = 31.1, 16.1 Hz, 1H), 2.85 (s, 3H), 2.63 (dd, J = 23.6, 11.8 Hz, 1H), 1.00 (t, J = 7.1 Hz, 3H); **<sup>13</sup>C NMR (126 MHz, CDCl<sub>3</sub>)** δ 163.42 (t, J = 32.13 Hz), 148.97 (s), 144.35 (m), 138.59 (m), 129.39 (m), 129.04 (s), 128.86 (s), 120.92 (s), 117.35 (s), 115.41 (dd, J = 240.66, 175.14 Hz), 63.07 (s), 52.51 (dd, J = 10.0, 3.6 Hz), 36.20 (t, J = 10.71 Hz), 32.07 (s), 13.67 (s);



**$^{19}\text{F}$  NMR (470 MHz,  $\text{CDCl}_3$ )**  $\delta$ -101.22 (d,  $J$ = 263.2 Hz, 1F), -110.51 (d,  $J$ = 253.8 Hz, 1F), -137.82 (d,  $J$  = 21.5 Hz, 2F), -153.10 (s, 1F), -160.54 (dd,  $J$  = 37.6, 23.5 Hz, 2F); **ESI-MS**  $m/z$ : 424.3308  $[\text{M}+1]^+$ .

**Ethyl 2,2-difluoro-3-methyl-4-(methyl(phenyl)amino)-4-phenylbutanoate (4p)**

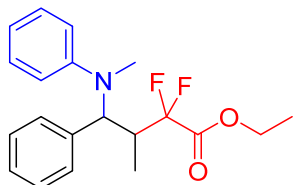

Following the general procedure, the title compound was obtained (56.2 mg, 81% yield, colorless oil).  **$^1\text{H}$  NMR (500 MHz,  $\text{CDCl}_3$ )**  $\delta$ 7.23 (t,  $J$  = 8.6 Hz, 5H), 7.18 (d,  $J$  = 7.6 Hz, 2H), 6.84 (d,  $J$  = 8.2 Hz, 2H), 6.75 (t,  $J$  = 7.3 Hz, 1H), 5.12 (d,  $J$  = 10.6 Hz, 1H), 3.82 (dd,  $J$  = 10.7, 7.2 Hz, 1H), 3.73 (dd,  $J$  = 10.7, 7.2 Hz, 1H), 3.35 (dd,  $J$  = 17.1, 6.9 Hz, 1H), 2.57 (s, 3H), 2.04 (s, 3H), 1.17 (t,  $J$  = 7.2 Hz, 3H);  **$^{13}\text{C}$  NMR (126 MHz,  $\text{CDCl}_3$ )**  $\delta$ 164.09 (t,  $J$ = 32.13 Hz), 150.18 (s), 136.91 (s), 129.22 (s), 128.15 (s), 128.00 (s), 127.71 (s), 118.42 (dd,  $J$ = 257.4, 249.8 Hz), 117.73 (s), 114.23 (s), 62.69 (s), 60.44 (s), 39.16 (t,  $J$  = 21.42 Hz), 32.07 (s), 14.24 (s), 10.61 (s);  **$^{19}\text{F}$  NMR (470 MHz,  $\text{CDCl}_3$ )**  $\delta$ -106.22 (dd,  $J$  = 253.8, 9.4 Hz, 1F), -112.44 (dd,  $J$  = 253.8, 14.1 Hz, 1F); **ESI-MS**  $m/z$ : 348.4058  $[\text{M}+1]^+$ .

**Ethyl 2,2-difluoro-4-(methyl(phenyl)amino)-5-phenylpentanoate (4q)**

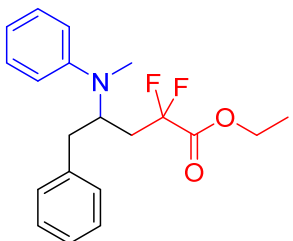

Following the general procedure, the title compound was obtained (50.7 mg, 73% yield, colorless oil).  **$^1\text{H}$  NMR (500 MHz,  $\text{CDCl}_3$ )**  $\delta$ 7.25 – 7.23 (m, 3H), 7.10 (d,  $J$  = 7.0 Hz, 2H), 6.99 (dd,  $J$  = 14.8, 7.2 Hz, 2H), 6.81 (d,  $J$  = 8.1 Hz, 2H), 6.77 (t,  $J$  = 7.3 Hz, 1H), 3.99 (dd,  $J$  = 10.7, 7.2 Hz, 1H), 3.85 (dd,  $J$  = 10.7, 7.2 Hz, 1H), 2.98 (s, 1H), 2.82 (d,  $J$  = 14.7 Hz, 2H), 2.66 (s, 3H), 2.15 (dd,  $J$  = 23.4, 11.4 Hz, 2H), 0.98 (t,  $J$  = 7.2 Hz, 3H);  **$^{13}\text{C}$  NMR (126 MHz,  $\text{CDCl}_3$ )**  $\delta$ 163.57 (t,  $J$  = 22.68 Hz), 149.93 (s), 135.26 (s), 129.15 (s), 127.89 (s), 125.11 (s), 121.60 (s), 118.89 (s), 115.83 (dd,  $J$ = 253.2, 245.7Hz), 115.51 (s), 60.45 (s), 57.59 (dd,  $J$ = 10.08, 2.52 Hz), 39.53 (s), 36.13 (t,  $J$ = 23.94 Hz), 31.91 (s), 14.23 (s);  **$^{19}\text{F}$  NMR (470 MHz,  $\text{CDCl}_3$ )**  $\delta$ -100.20 (dd,  $J$  = 249.1, 103.4 Hz, 1F), -109.22 (d,  $J$  = 258.5 Hz, 1F); **ESI-MS**  $m/z$ : 348.1697  $[\text{M}+1]^+$ .

#### Ethyl 2,2-difluoro-4-(methyl(p-tolyl)amino)-4-(p-tolyl)butanoate (4s)

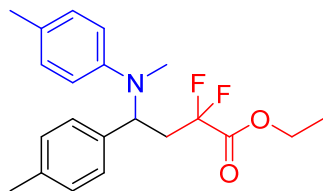

Following the general procedure, the title compound was obtained (54.9 mg, 76% yield, colorless oil). **<sup>1</sup>H NMR (500 MHz, CDCl<sub>3</sub>)** δ7.26 (d, J = 4.9 Hz, 2H), 7.08 (d, J = 7.7 Hz, 2H), 6.97 (d, J = 6.5 Hz, 2H), 6.88 (d, J = 5.8 Hz, 2H), 5.29 (d, J = 9.4 Hz, 1H), 4.00 (dd, J = 10.7, 7.2 Hz, 1H), 3.86 (dd, J = 10.7, 7.2 Hz, 1H), 3.20 (dd, J = 39.4, 14.2 Hz, 1H), 2.61 (dd, J = 24.0, 13.8 Hz, 1H), 2.38 (s, 3H), 2.31 (s, 3H), 2.06 (s, 3H), 1.00 (t, J = 7.1 Hz, 3H); **<sup>13</sup>C NMR (126 MHz, CDCl<sub>3</sub>)** δ163.67 (t, J = 31.2 Hz), 150.20 (s), 137.55 (s), 134.67 (s), 129.19 (s), 129.14 (s), 126.87 (s), 118.71 (s), 115.55 (s), 113.79 (dd, J = 255.4, 243.9 Hz), 62.78 (s), 57.85 (dd, J = 7.6, 4.2 Hz), 36.18 (t, J = 23.8 Hz), 31.93 (s), 21.10 (s), 13.55 (s); **<sup>19</sup>F NMR (471 MHz, CDCl<sub>3</sub>)** δ-99.91 (d, J = 263.2 Hz, 1F), -109.19 (dd, J = 258.5, 28.2 Hz, 1F); **ESI-MS** m/z: 361.1853 [M+1]<sup>+</sup>.

#### Ethyl 2,2-difluoro-4-((4-methoxyphenyl)(methyl)amino)-4-(p-tolyl)butanoate (4t)<sup>[1]</sup>

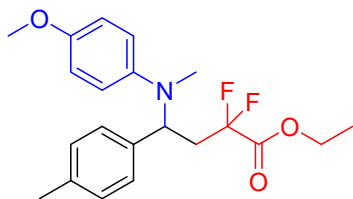

Following the general procedure, the title compound was obtained (61.8 mg, 82% yield, colorless oil). **<sup>1</sup>H NMR (500 MHz, CDCl<sub>3</sub>)** δ7.24 (dd, J = 7.9, 6.4 Hz, 2H), 6.98 (d, J = 8.6 Hz, 2H), 6.86 (d, J = 8.1 Hz, 2H), 6.82 – 6.78 (m, 2H), 5.27 (d, J = 8.3 Hz, 1H), 3.99 (dd, J = 10.7, 7.2 Hz, 1H), 3.85 (dd, J = 10.7, 7.2 Hz, 1H), 3.76 (s, 3H), 3.16 (dd, J = 27.0, 20.9 Hz, 1H), 2.57 (dd, J = 23.7, 9.8 Hz, 1H), 2.48 (s, 3H), 2.34 (s, 3H), 0.99 (t, J = 7.2 Hz, 3H); **<sup>13</sup>C NMR (126 MHz, CDCl<sub>3</sub>)** δ164.26 (t, J = 31.5 Hz), 153.33 (s), 145.88 (s), 138.82 (s), 130.37 (s), 129.67 (s), 128.62 (s), 116.21 (s), 115.90 (dd, J = 257.1, 245.9 Hz), 114.35 (s), 63.32 (s), 58.23 (dd, J = 9.1, 2.0 Hz), 36.79 (t, J = 23.94 Hz), 32.31 (s), 23.33 (s), 14.10 (s); **<sup>19</sup>F NMR (471 MHz, CDCl<sub>3</sub>)** δ-99.83 (tt, J = 263.2 Hz, 1F), -105.69 (dd, J = 258.5, 28.2 Hz, 1F); **ESI-MS** m/z: 378.1803 [M+1]<sup>+</sup>.

## 4. Control experiments

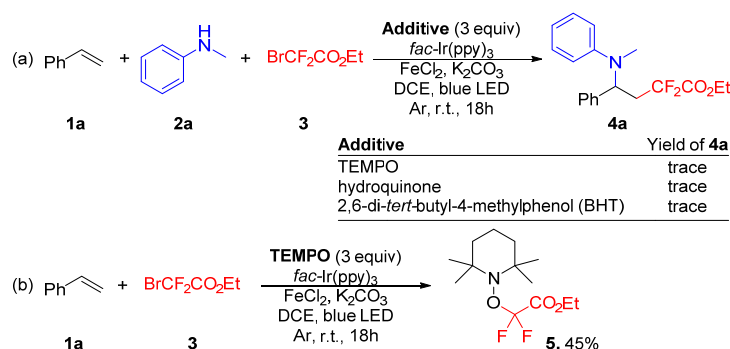

**Reaction (a):** A 10 mL reaction vessel with a magnetic stirring bar was equipped with *fac*-Ir(ppy)<sub>3</sub> (1.3 mg, 0.002mmol, 0.01 equiv), FeCl<sub>2</sub> (5.1 mg, 0.04 mmol, 0.2 equiv), K<sub>2</sub>CO<sub>3</sub> (82.9 mg, 0.6 mmol, 3.0 equiv) and TEMPO/BHT/hydroquinone (0.6 mmol, 3.0 equiv). The tube was then evacuated and back-filled with argon (Ar) for 3 times. Subsequently, DCE (2 mL) was added followed by styrene **1a** (20.8mg, 0.2 mmol, 1.0 equiv), N-Me aniline **2a** (32.1mg, 0.3 mmol, 1.5 equiv) and BrCF<sub>2</sub>CO<sub>2</sub>Et **3** (101.6mg, 0.5 mmol, 2.5 equiv) via syringe under Ar. Once added, the Schlenk tube was sealed at atmospheric pressure of Ar (1 atm). The reaction was stirred and irradiated with a 5 W blue LED lamp at r.t. for 18 h. No desired product **4a** was detected.

**Reaction (b):** A 10 mL reaction vessel with a magnetic stirring bar was equipped with *fac*-Ir(ppy)<sub>3</sub> (1.3 mg, 0.002mmol, 0.01 equiv), FeCl<sub>2</sub> (5.1 mg, 0.04 mmol, 0.2 equiv) K<sub>2</sub>CO<sub>3</sub> (82.9 mg, 0.6 mmol, 3.0 equiv) and TEMPO (93.8 mg, 0.6 mmol, 3.0 equiv). The tube was then evacuated and back-filled with argon (Ar) for 3 times. Subsequently, DCE (2 mL) was added followed by styrene **1a** (20.8mg, 0.2 mmol, 1.0 equiv) and BrCF<sub>2</sub>CO<sub>2</sub>Et **3** (101.6mg, 0.5 mmol, 2.5 equiv) via syringe under Ar. Once added, the Schlenk tube was sealed at atmospheric pressure of Ar (1 atm). The reaction was stirred and irradiated with a 5 W blue LED lamp at r.t. for 18 h. Then, the solvent was removed in vacuum and the crude product was purified by silica gel flash column chromatography (silica: 200-300 mesh, petroleum ether/ethyl acetate99/1~98/2) to give the radical coupling adduct **5** (TEMPO-CF<sub>2</sub>COOEt) as colorless oil in 45% yield.

**Ethyl 2,2-difluoro-2-((2,2,6,6-tetramethylpiperidin-1-yl)oxy)acetate**<sup>[2]</sup>

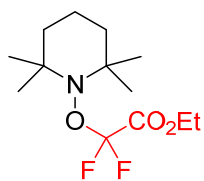

**$^1\text{H}$  NMR (500 MHz,  $\text{CDCl}_3$ )**  $\delta$  4.30 (q,  $J$  = 7.1 Hz, 2H), 1.58-1.55 (m, 6H), 1.36 (t,  $J$  = 12.5 Hz, 3H), 1.20 (d,  $J$  = 25 Hz, 12H);  **$^{13}\text{C}$  NMR (126 MHz,  $\text{CDCl}_3$ )**  $\delta$  163.58 (t,  $J$  = 32.13 Hz), 114.93 (t,  $J$  = 252 Hz), 62.86 (s), 61.34 (s), 40.12 (s), 33.23 (s), 21.18 (s), 16.97 (s), 13.10 (s);  **$^{19}\text{F}$  NMR (470 MHz,  $\text{CDCl}_3$ )**  $\delta$  -73.44 (s). **ESI-MS**  $m/z$ : 280.3278  $[\text{M}+1]^+$ .

## References:

[1] S. N. Gockel, T. L. Buchanan, K. L. Hull, *J. Am. Chem. Soc.* 2018, **140**, 58.

[2] Nie, X.; Cheng, C.; Zhu, G. *Angew. Chem., Int. Ed.* 2017, **56**, 1898.

## 5. NMR Spectra

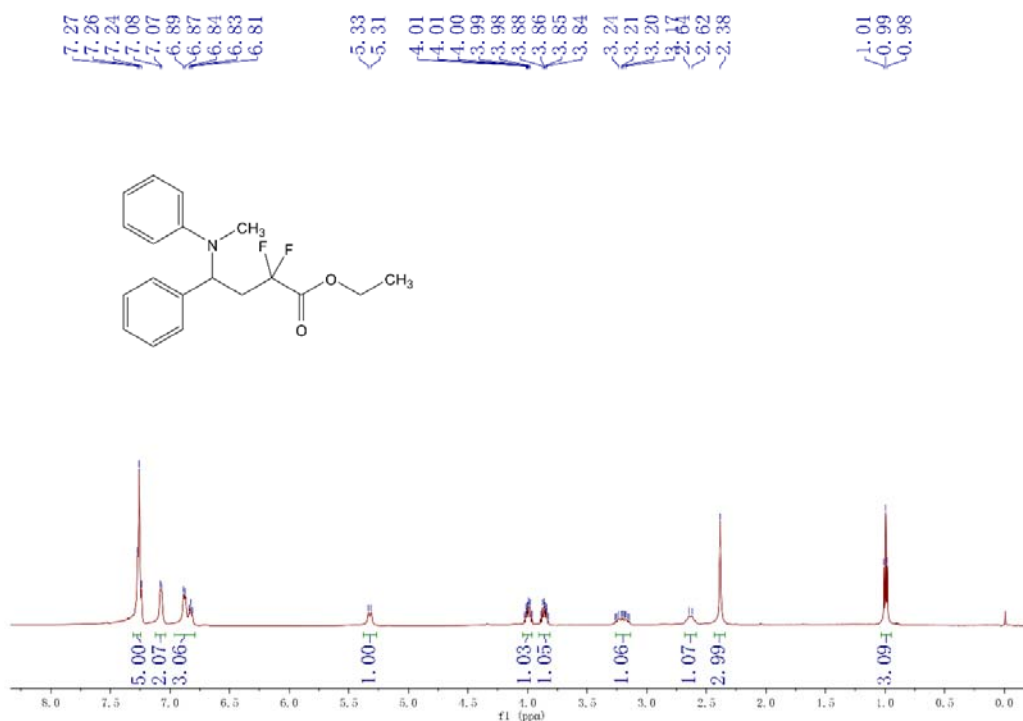

$^1\text{H}$  NMR of **4a**

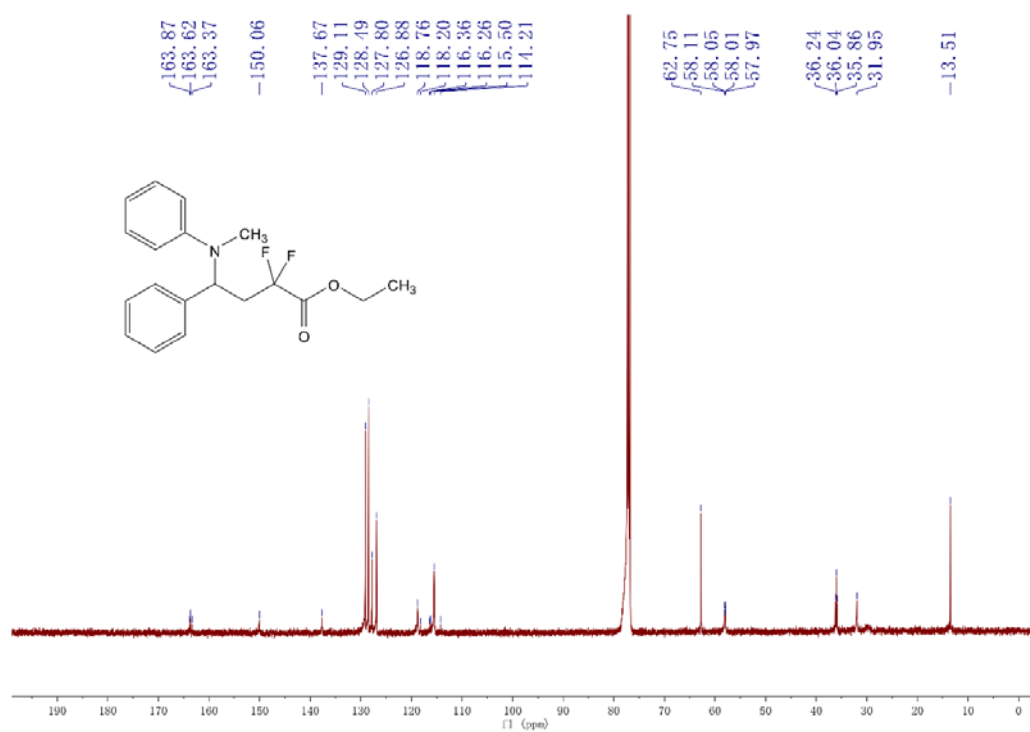

<sup>13</sup>C NMR of **4a**

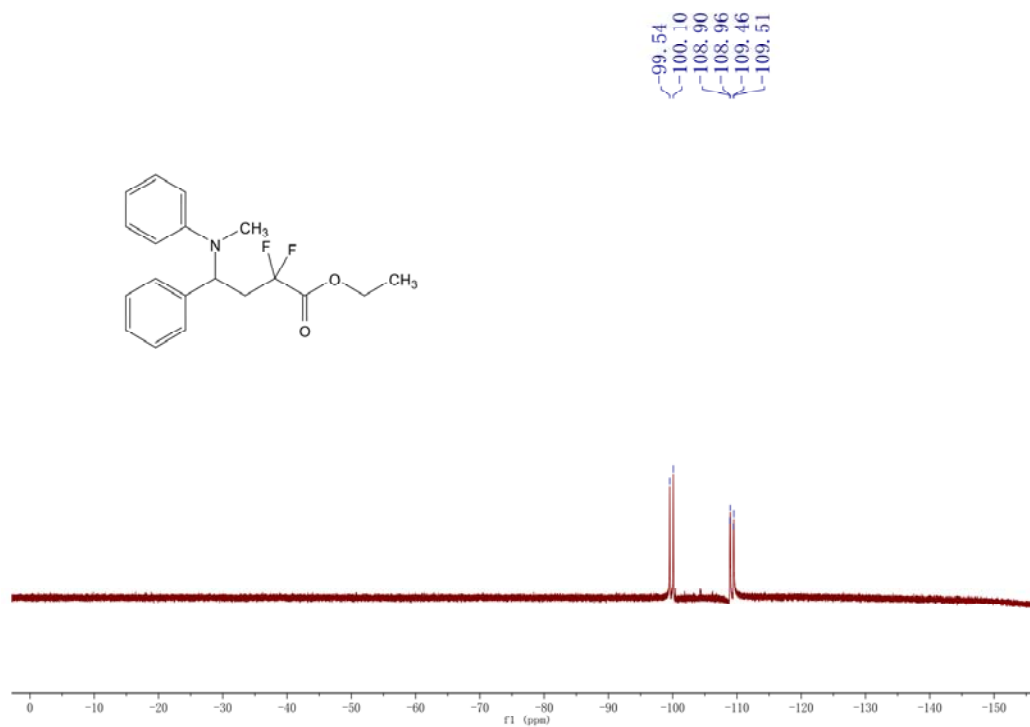

<sup>19</sup>F NMR of **4a**

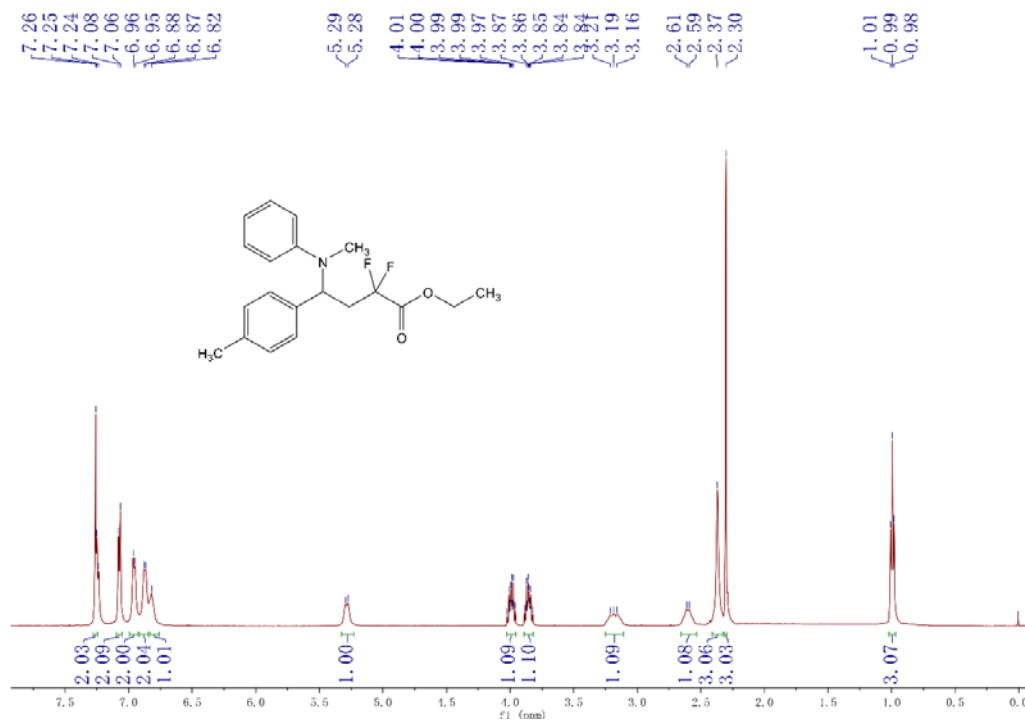

<sup>1</sup>H NMR of **4b**

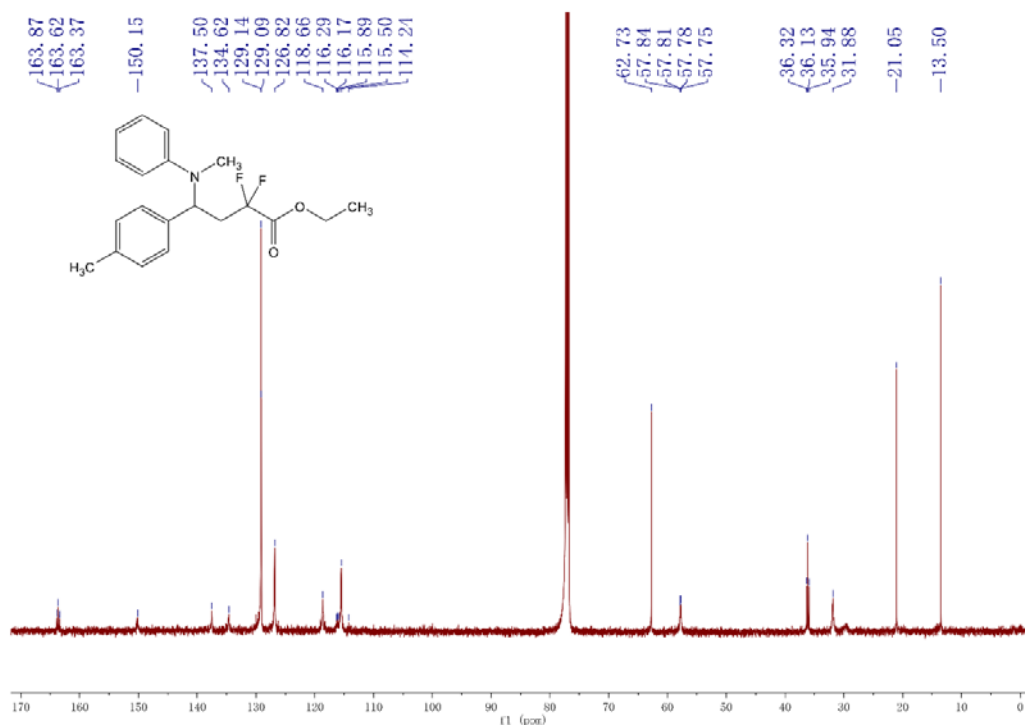

<sup>13</sup>C NMR of **4b**

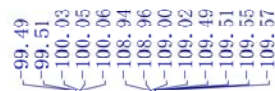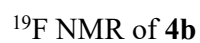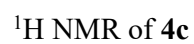

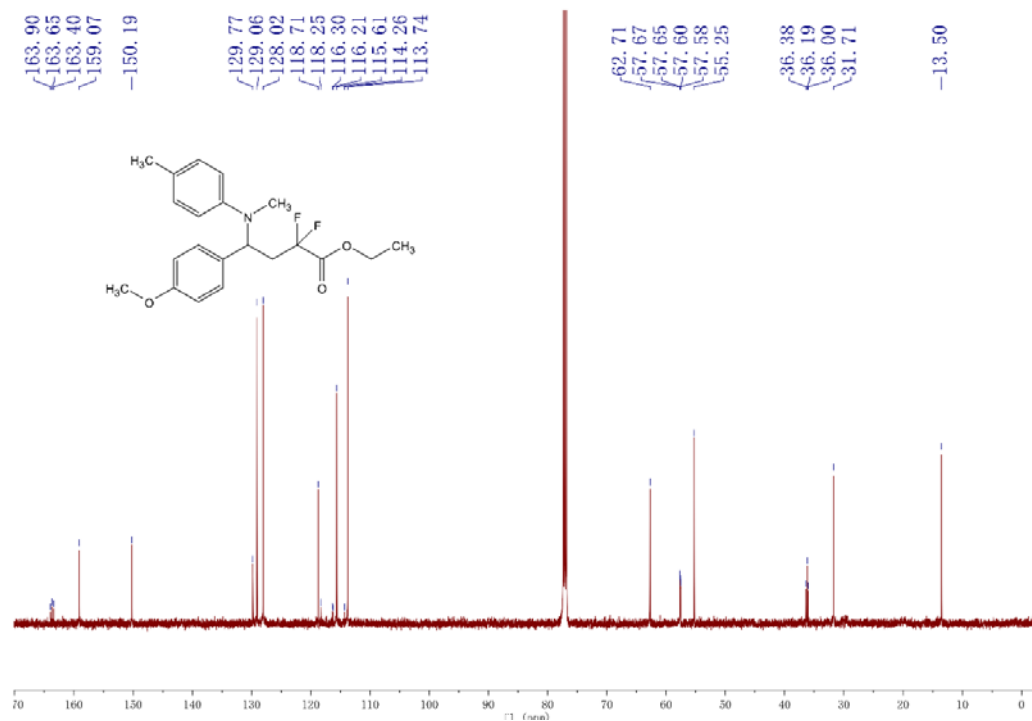

$^{13}\text{C}$  NMR of **4c**

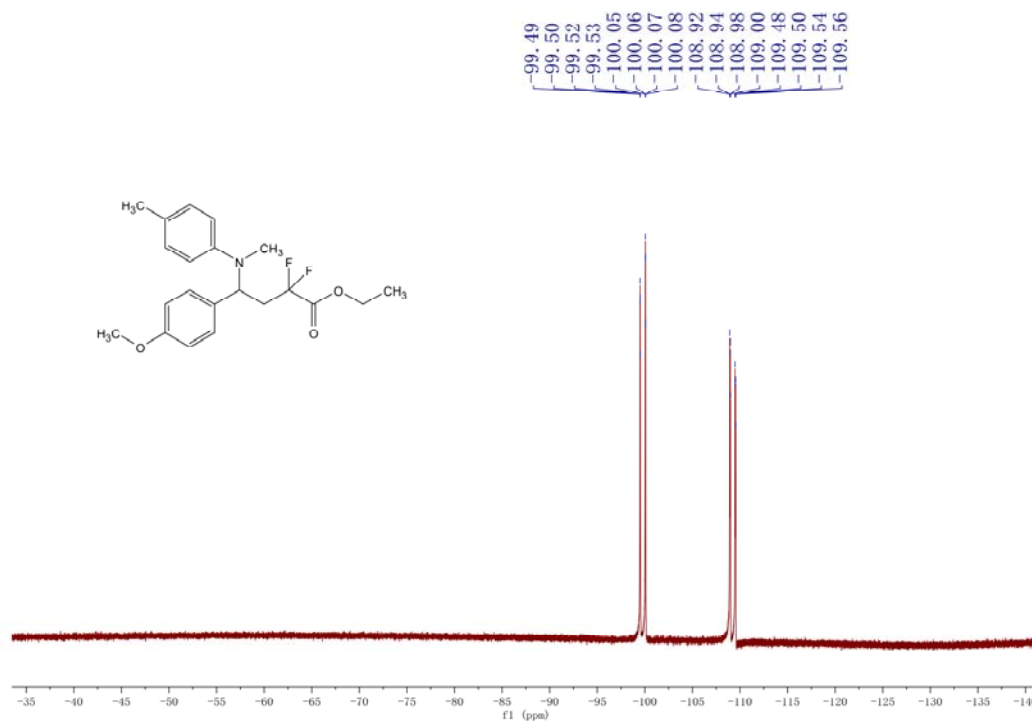

$^{19}\text{F}$  NMR of **4c**



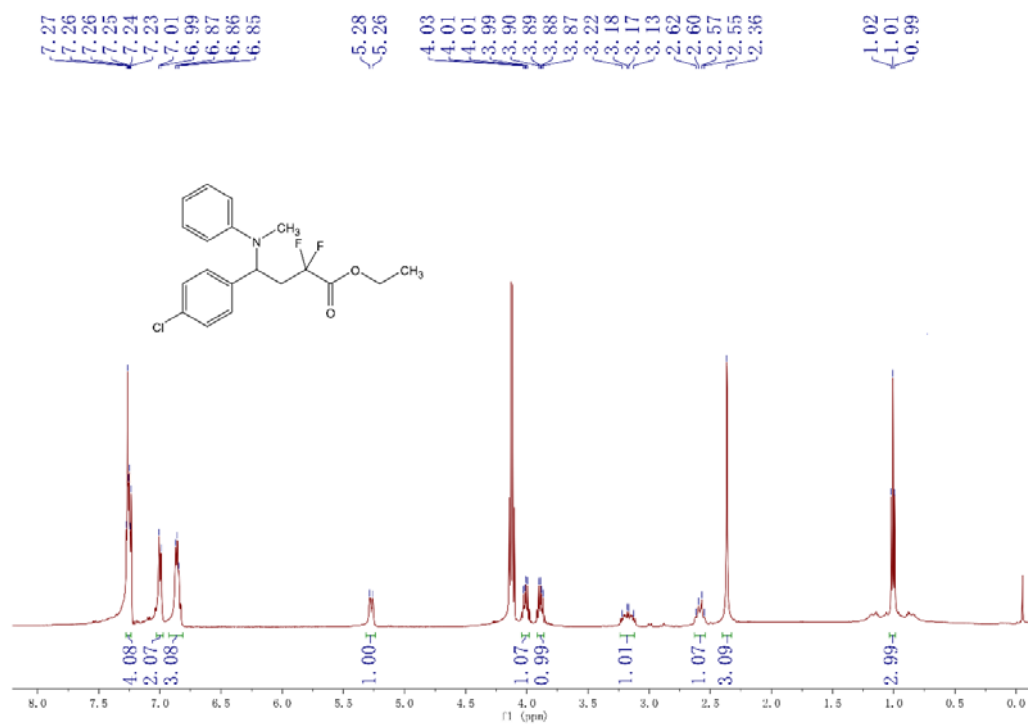

<sup>1</sup>H NMR of **4d**

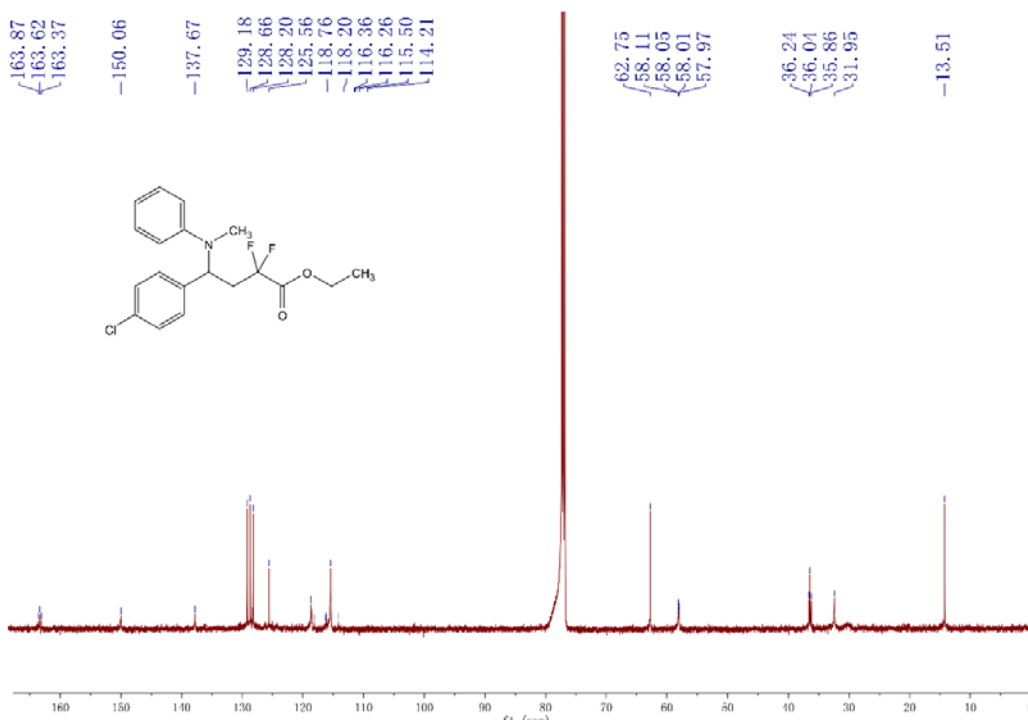

<sup>13</sup>C NMR of **4d**

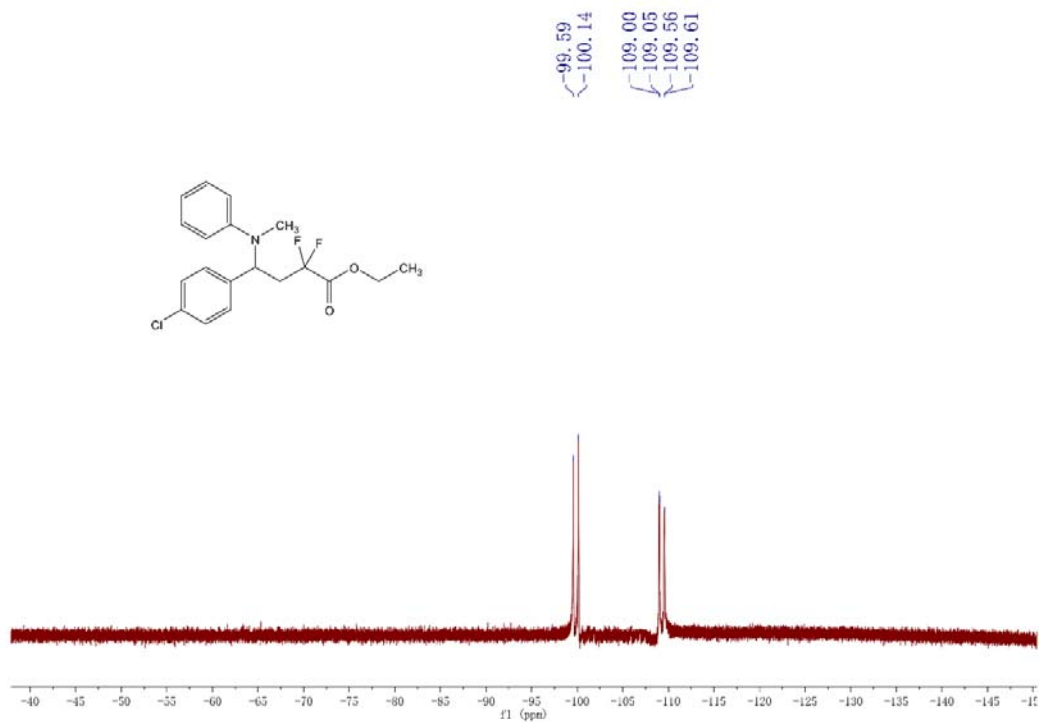

$^{19}\text{F}$  NMR of **4d**

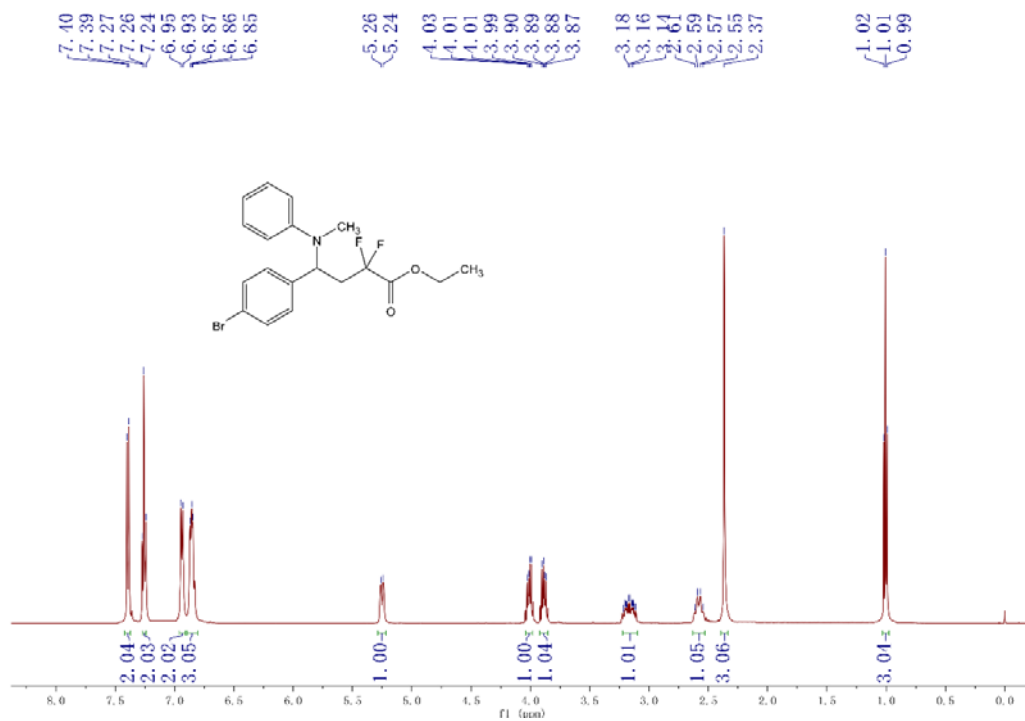

$^1\text{H}$  NMR of **4e**

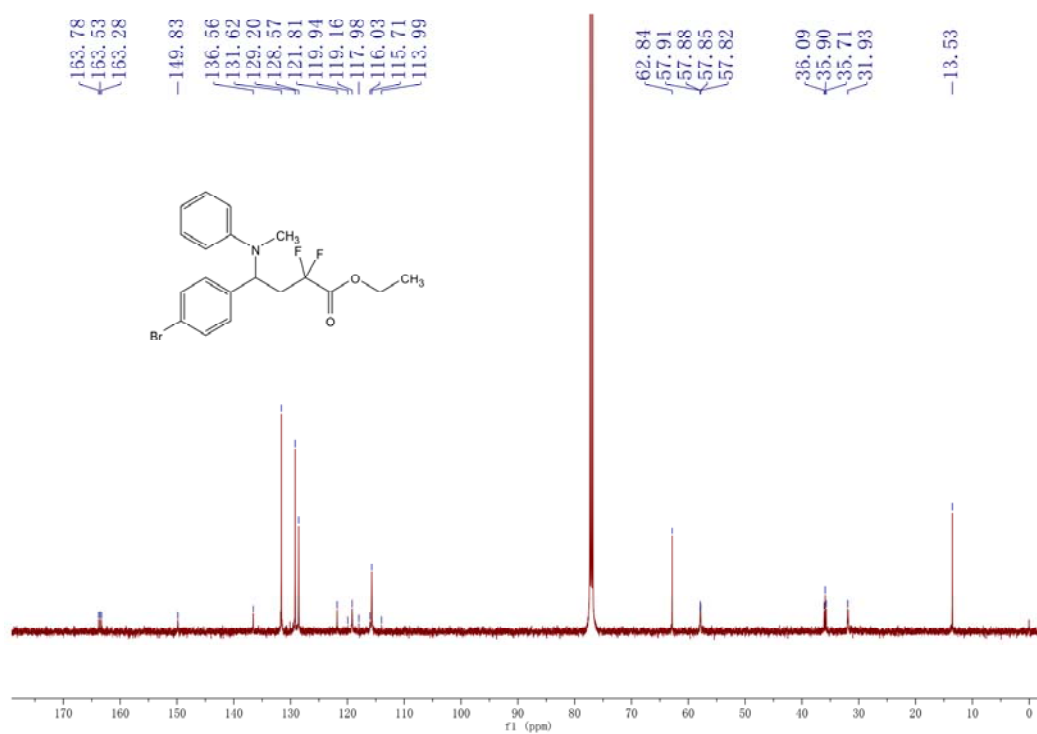

<sup>13</sup>C NMR of 4e

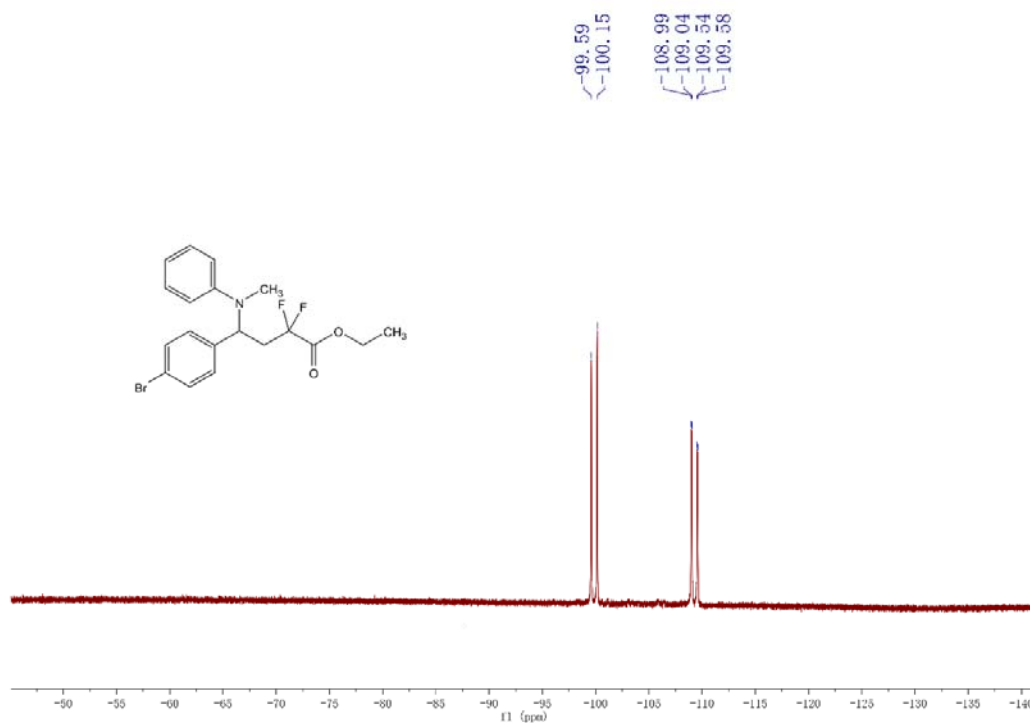

<sup>19</sup>F NMR of 4e

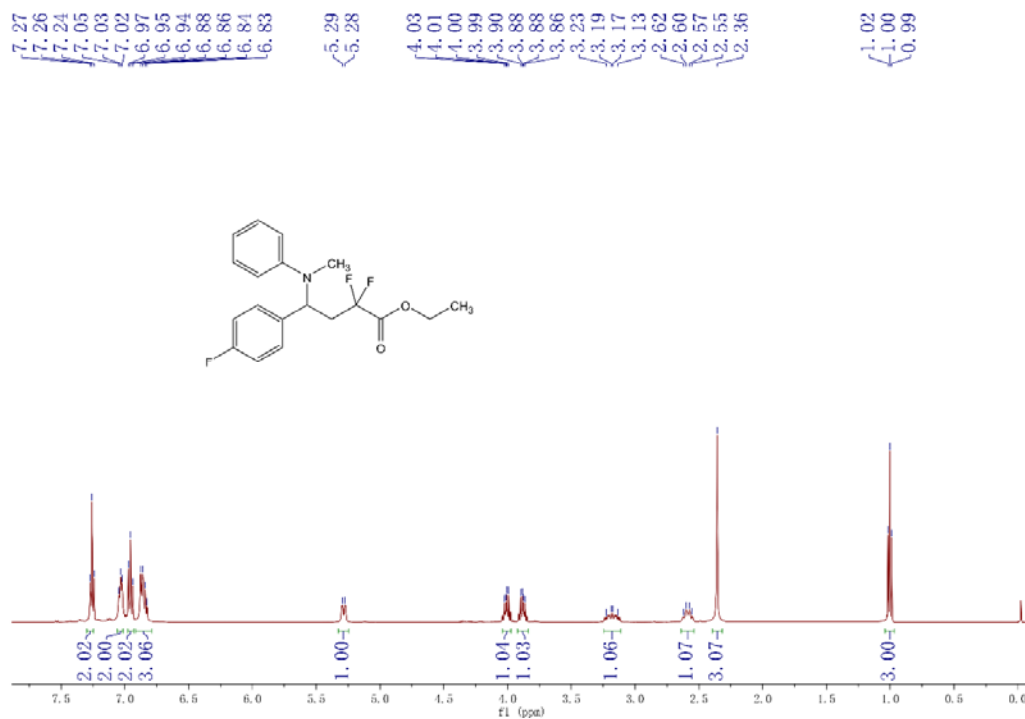

<sup>1</sup>H NMR of **4f**

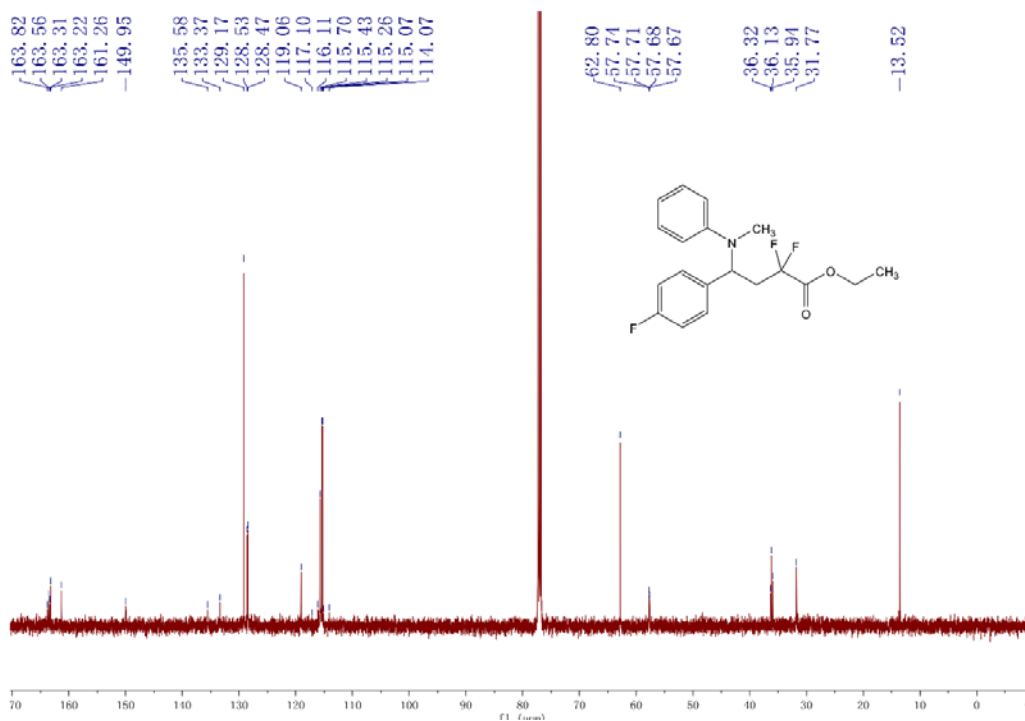

<sup>13</sup>C NMR of **4f**

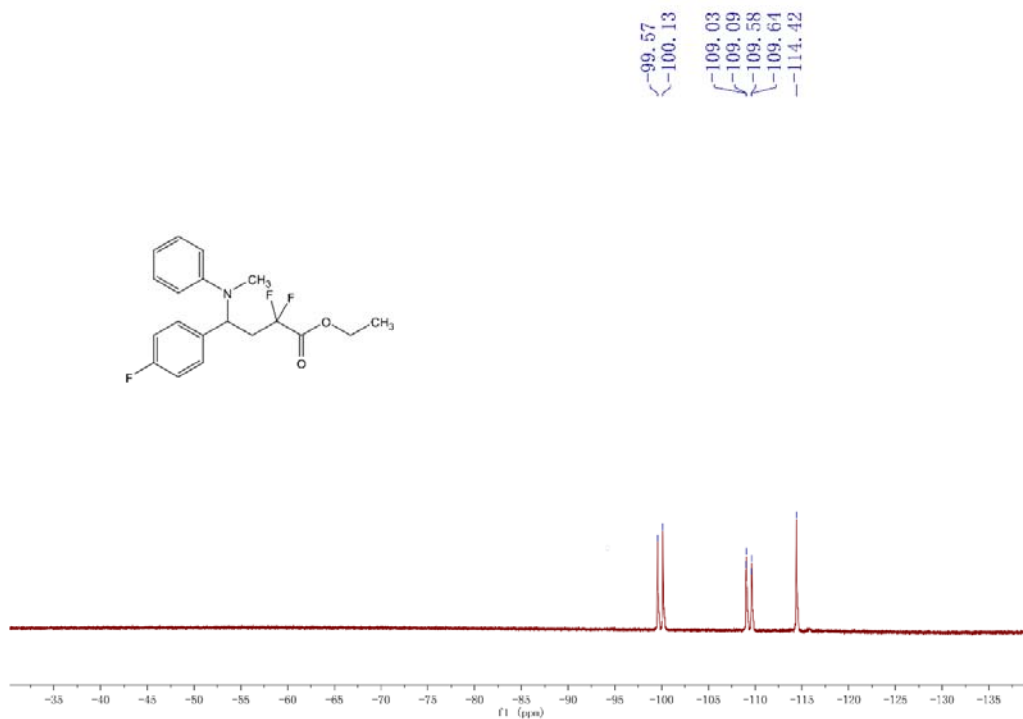

$^{19}\text{F}$  NMR of **4f**

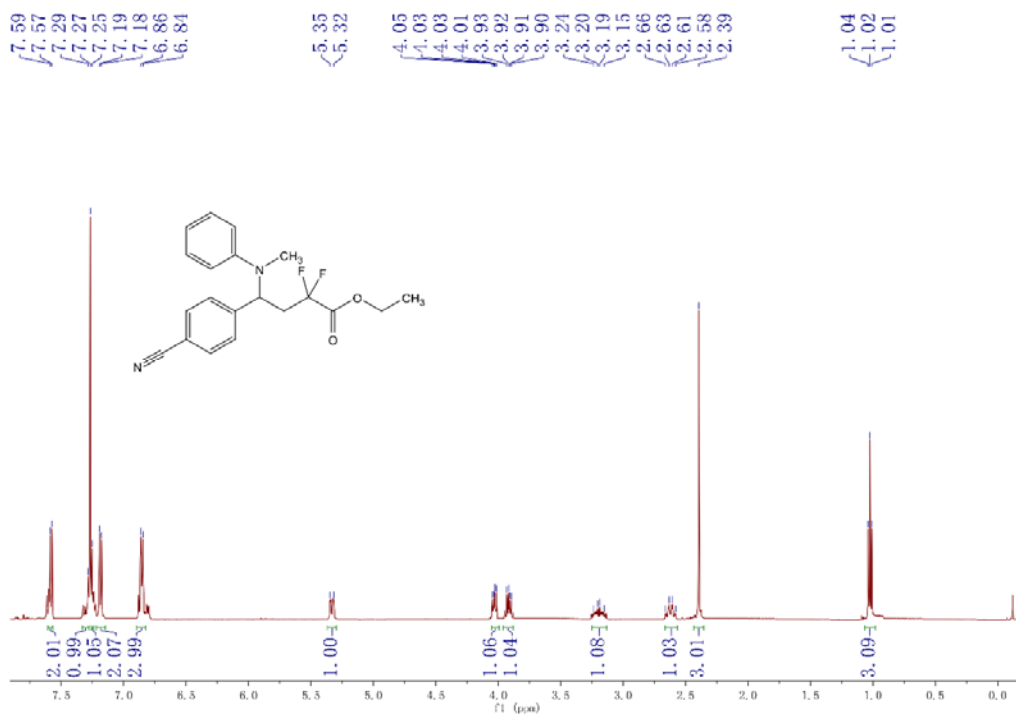

$^1\text{H}$  NMR of **4g**

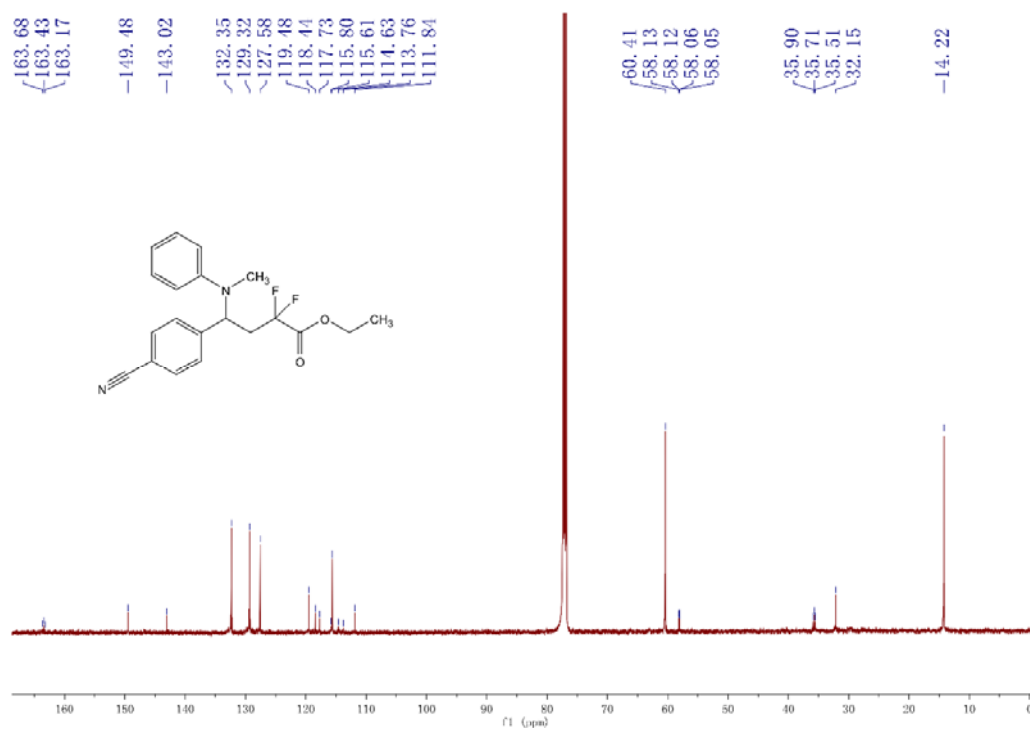

$^{13}\text{C}$  NMR of **4g**

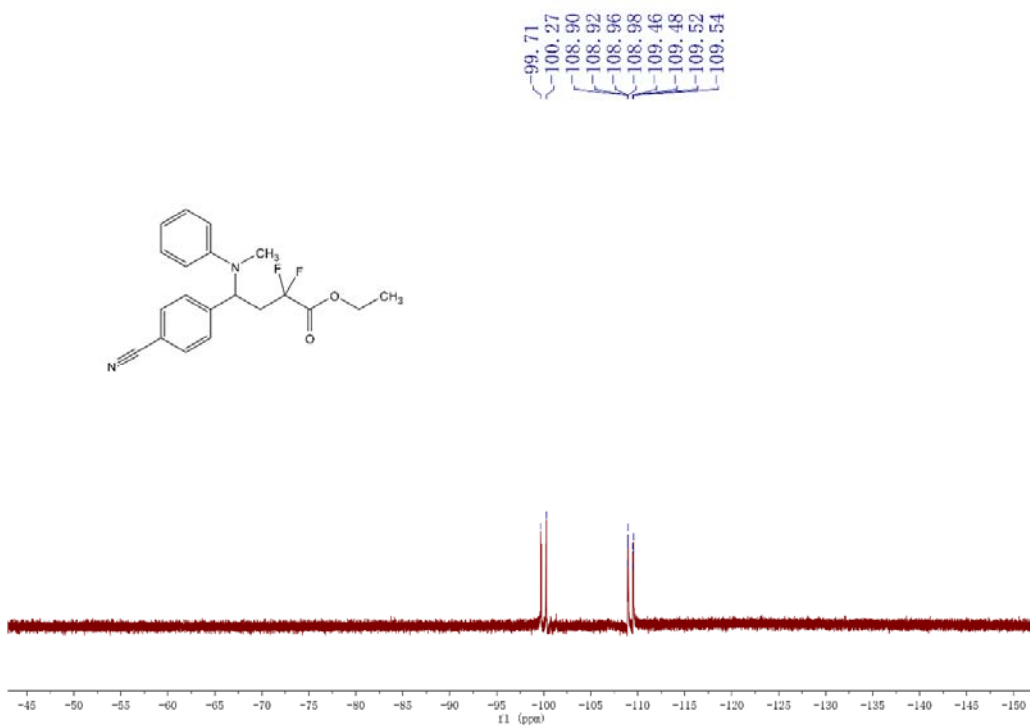

$^{19}\text{F}$  NMR of **4g**

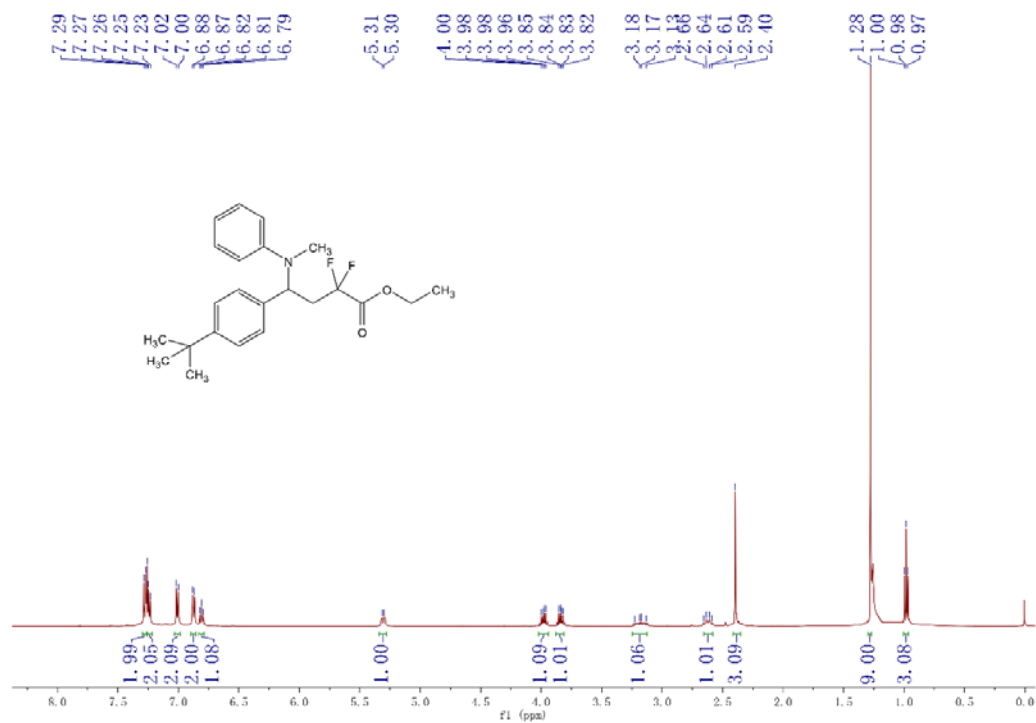

<sup>1</sup>H NMR of **4h**

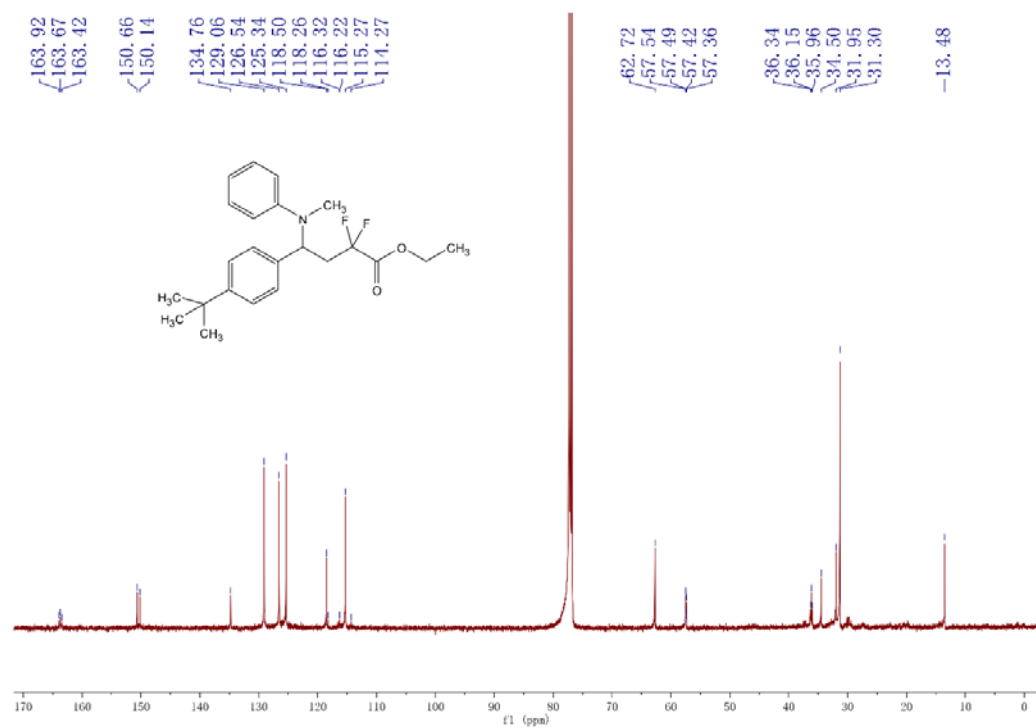

<sup>13</sup>C NMR of **4h**

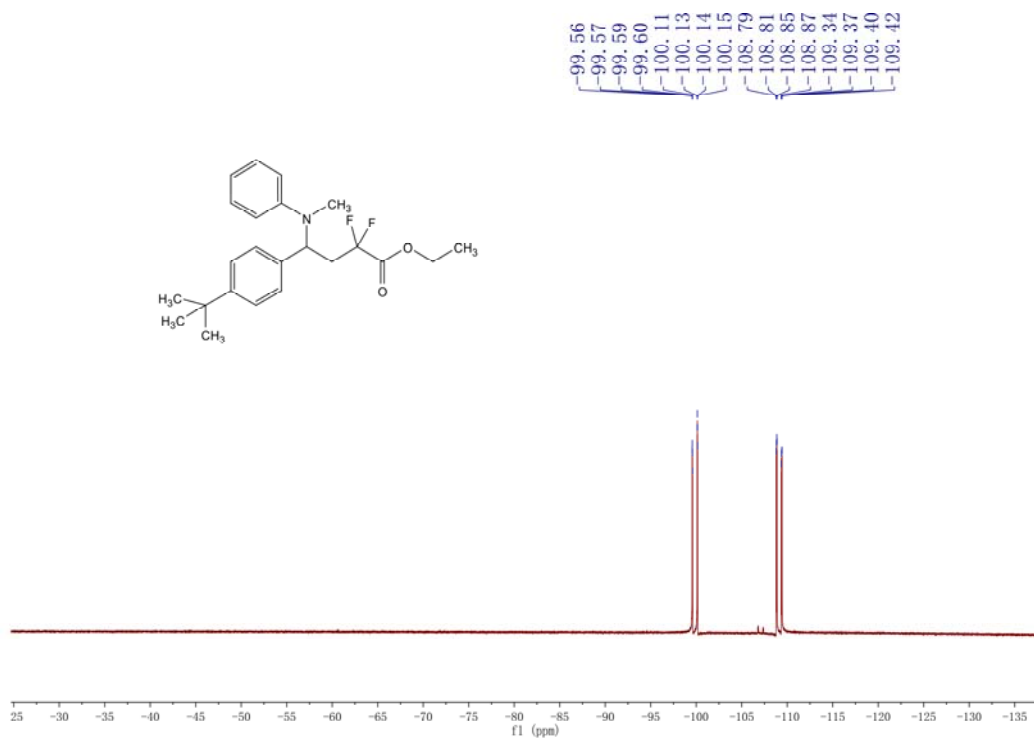

<sup>19</sup>F NMR of **4h**

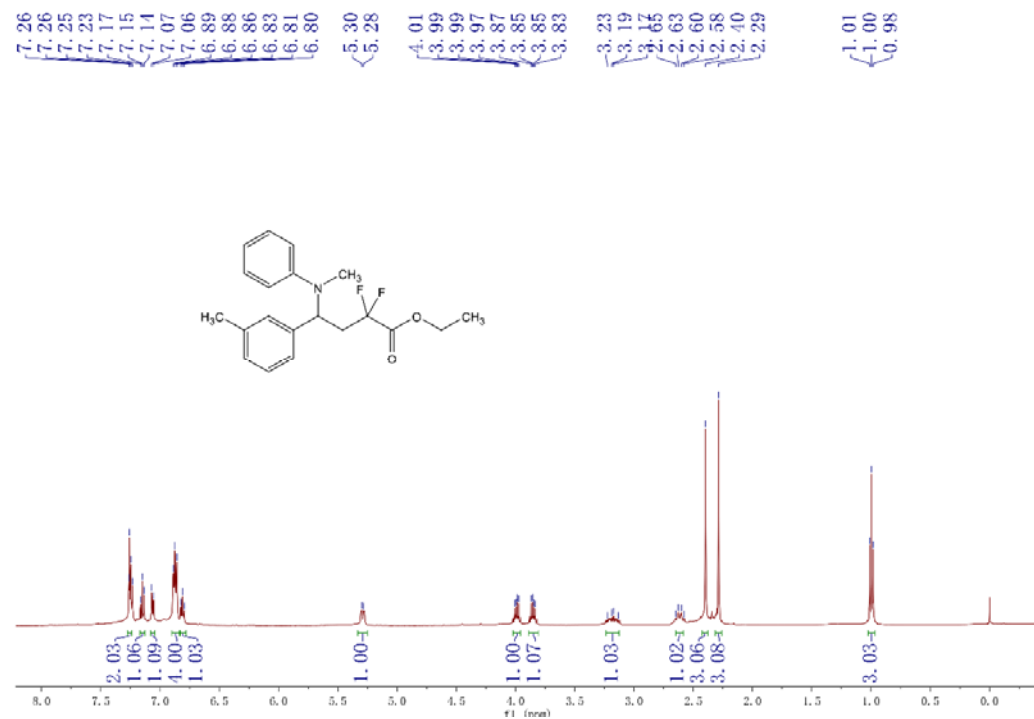

<sup>1</sup>H NMR of **4i**



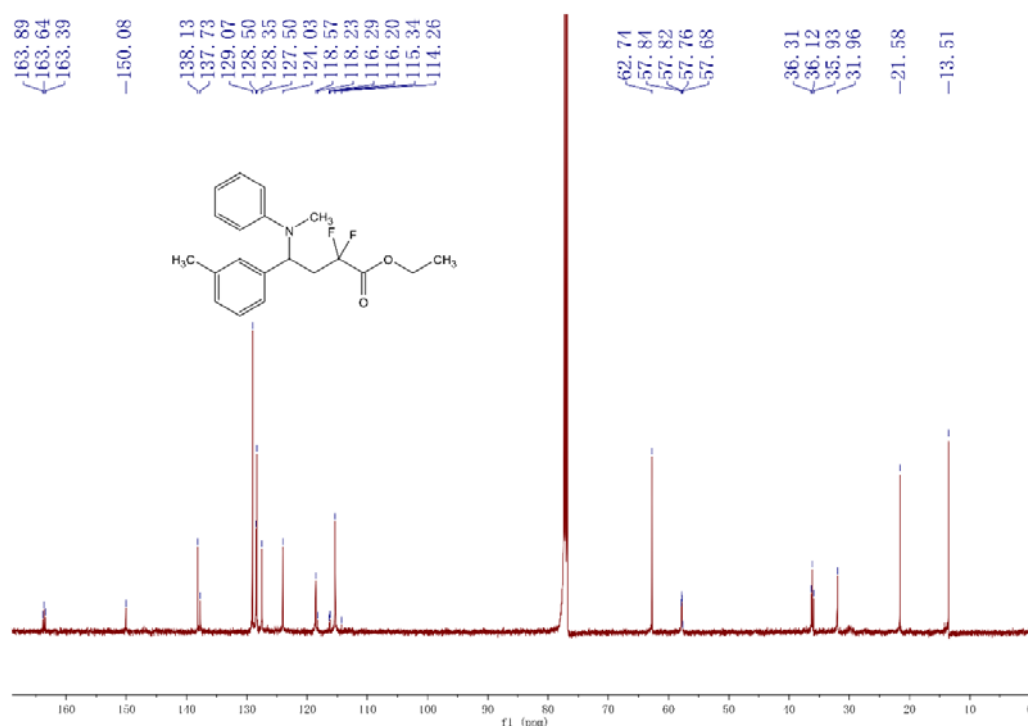

<sup>13</sup>C NMR of **4i**

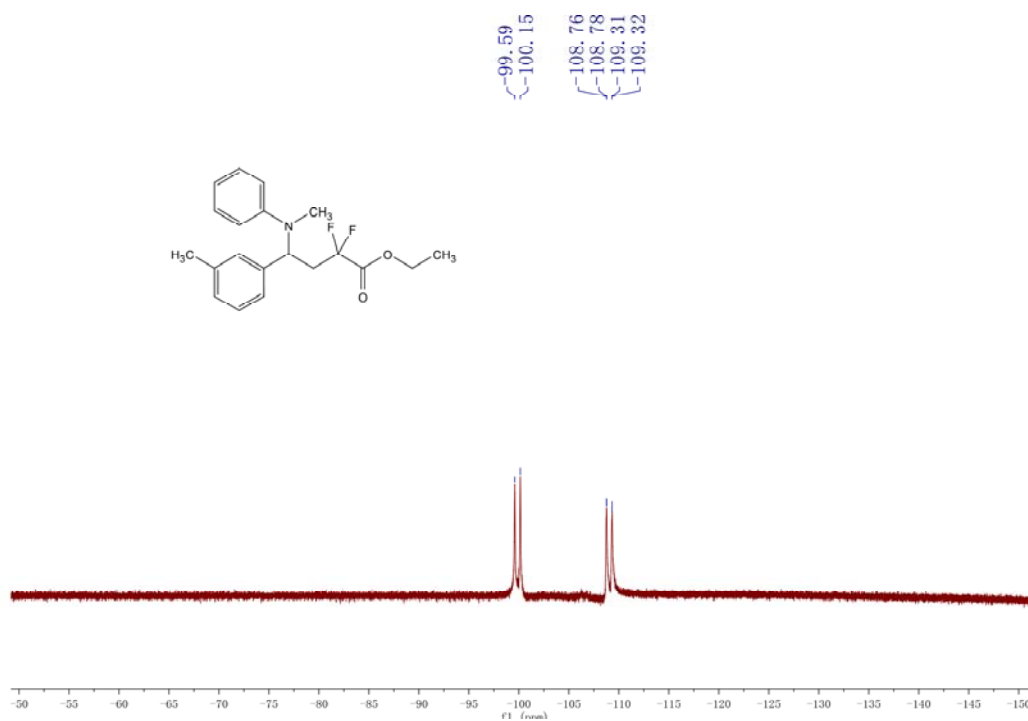

<sup>19</sup>F NMR of **4i**

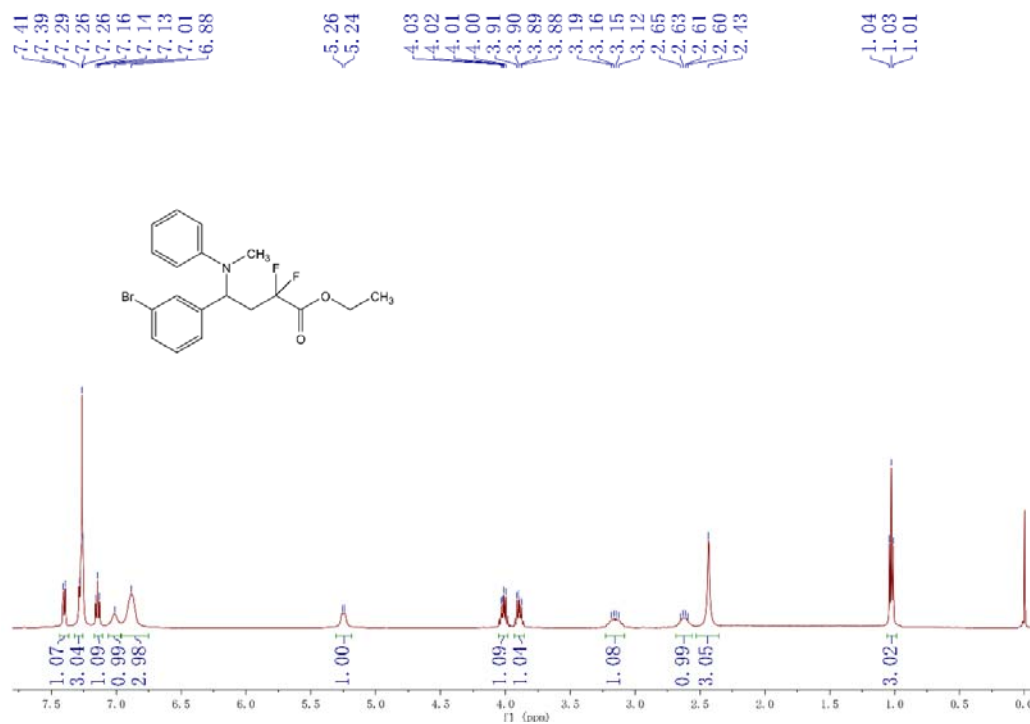

<sup>1</sup>H NMR of **4j**

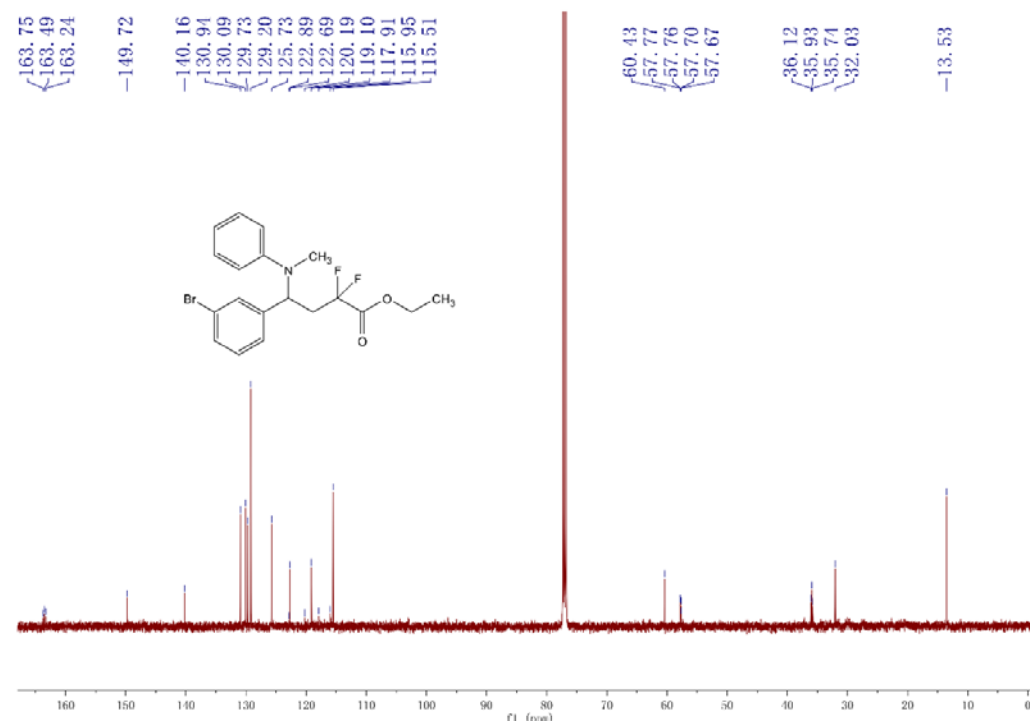

<sup>13</sup>C NMR of **4j**

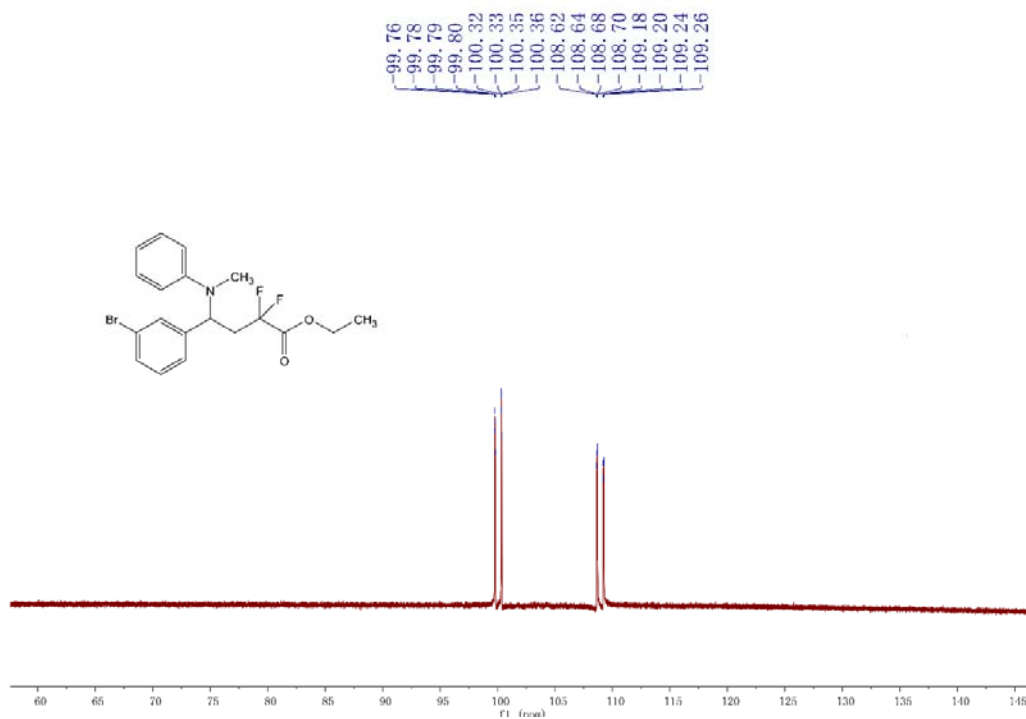

<sup>19</sup>F NMR of **4j**

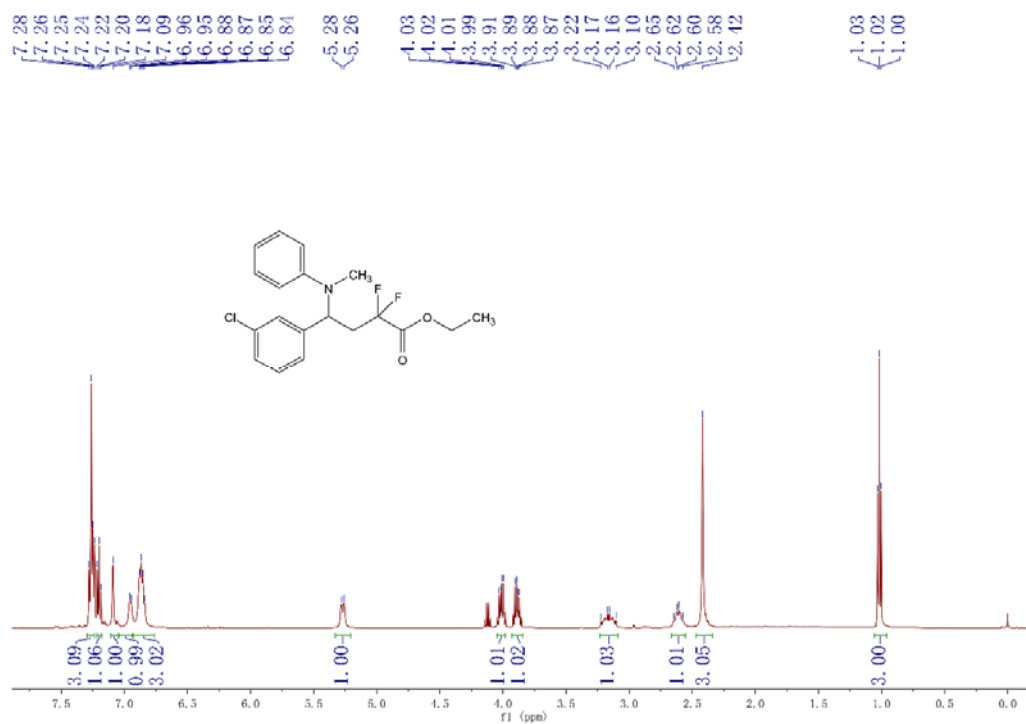

<sup>1</sup>H NMR of **4k**

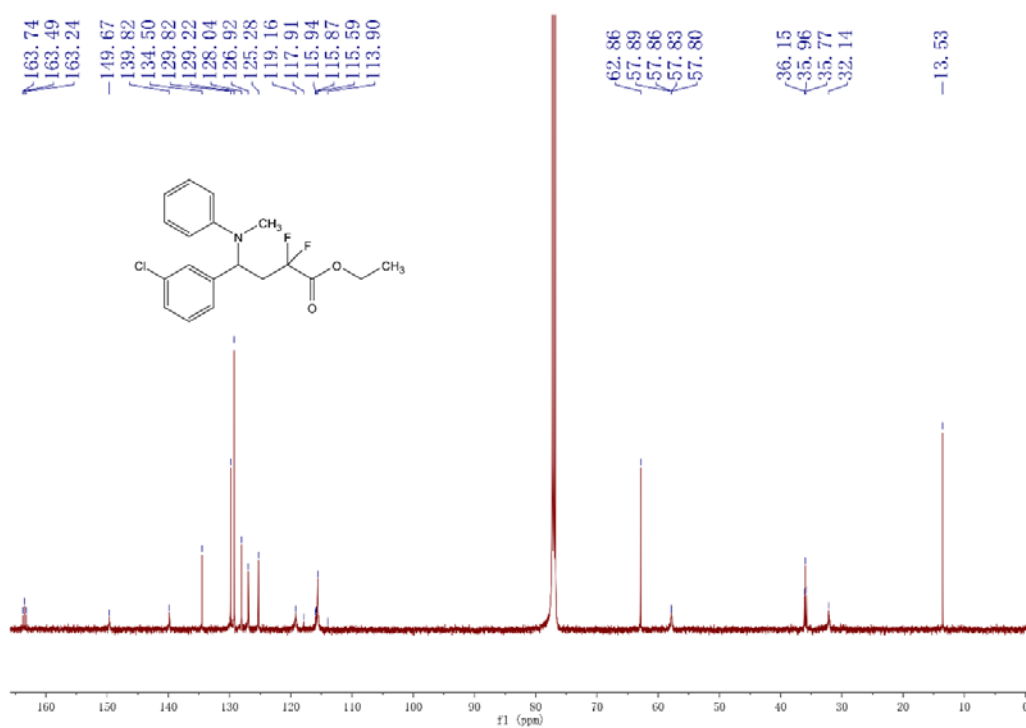

<sup>13</sup>C NMR of **4k**

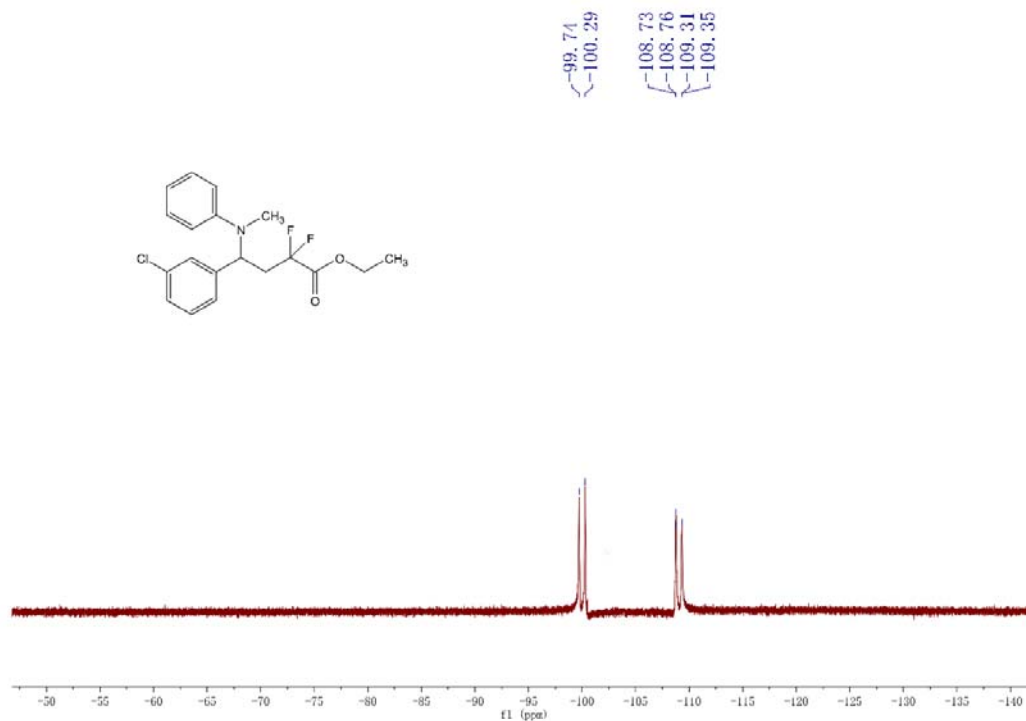

<sup>19</sup>F NMR of **4k**

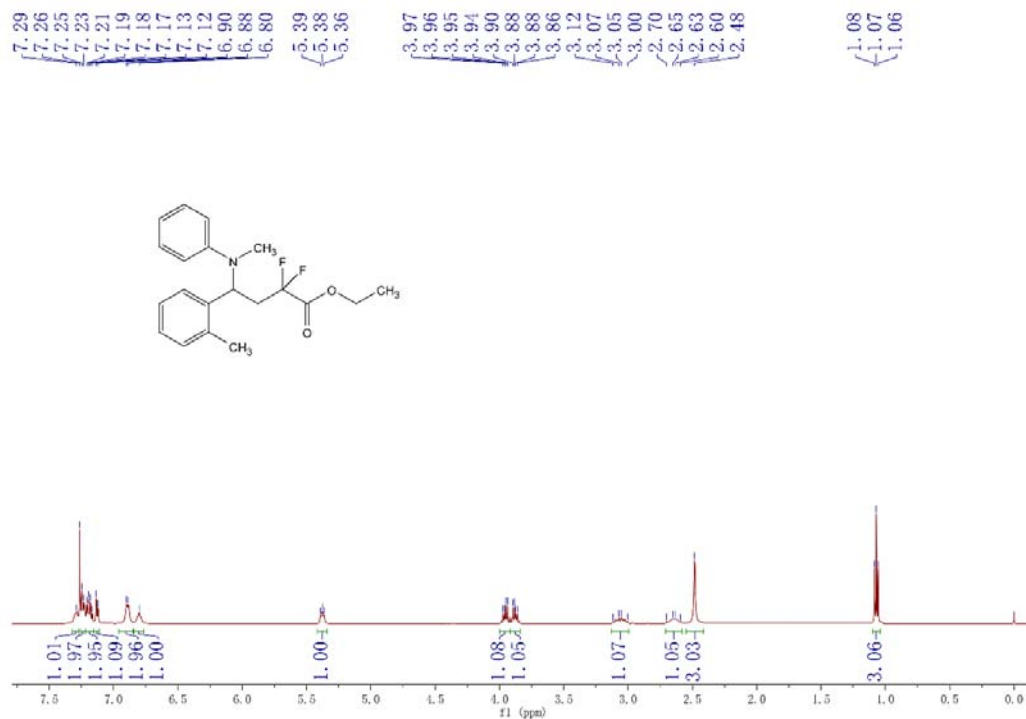

<sup>1</sup>H NMR of **41**

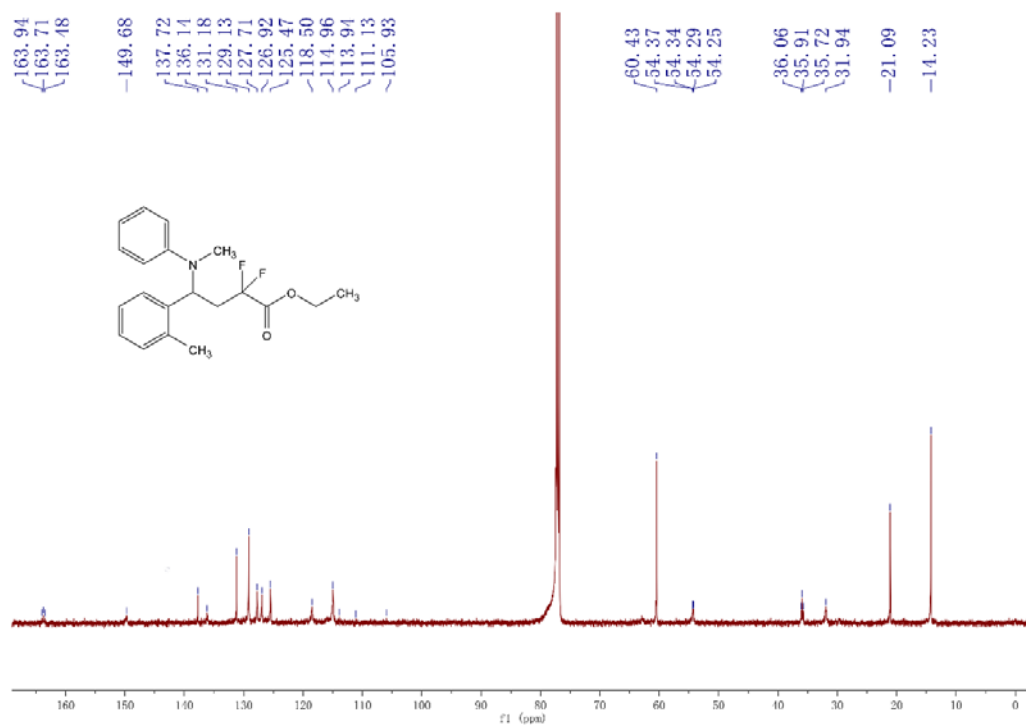

<sup>13</sup>C NMR of **41**

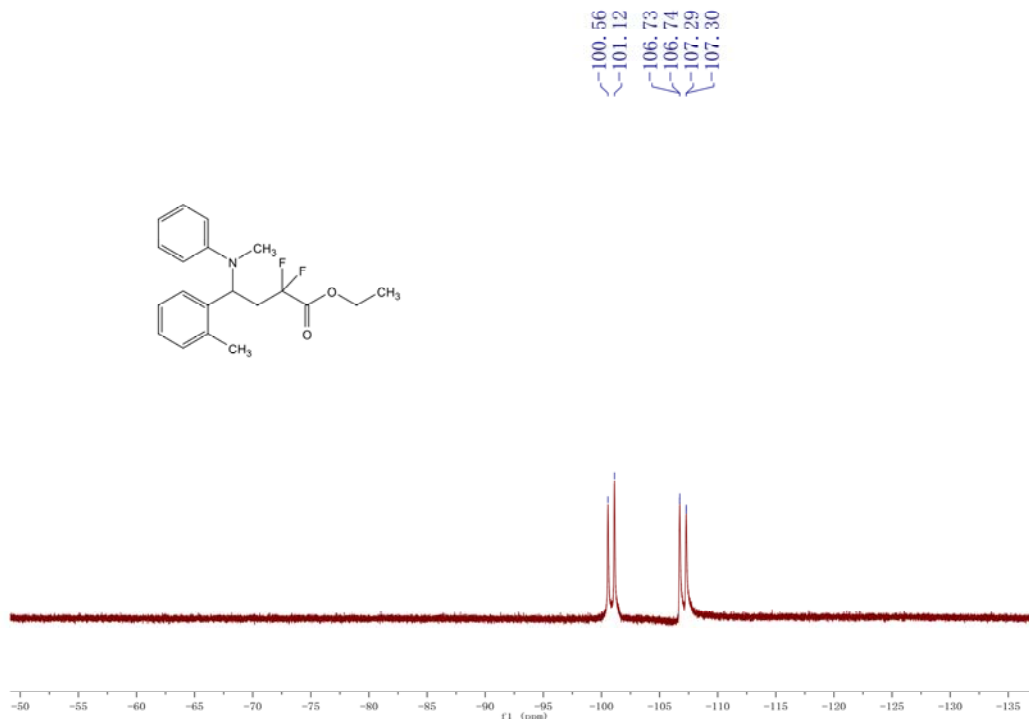

<sup>19</sup>F NMR of **4l**

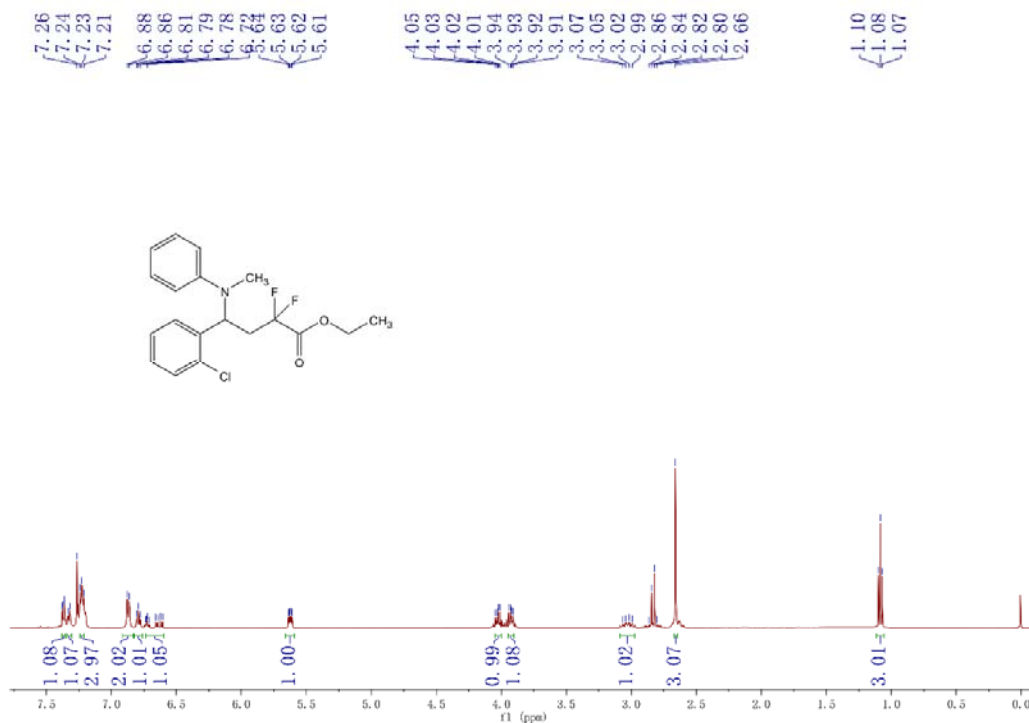

<sup>1</sup>H NMR of **4m**

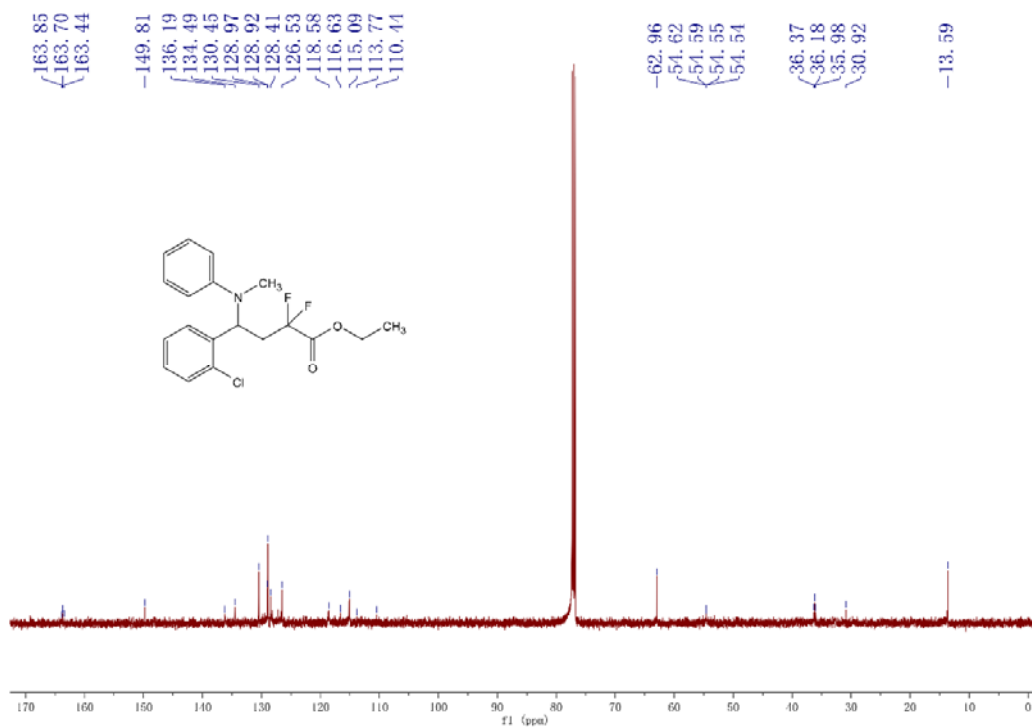

<sup>13</sup>C NMR of **4m**

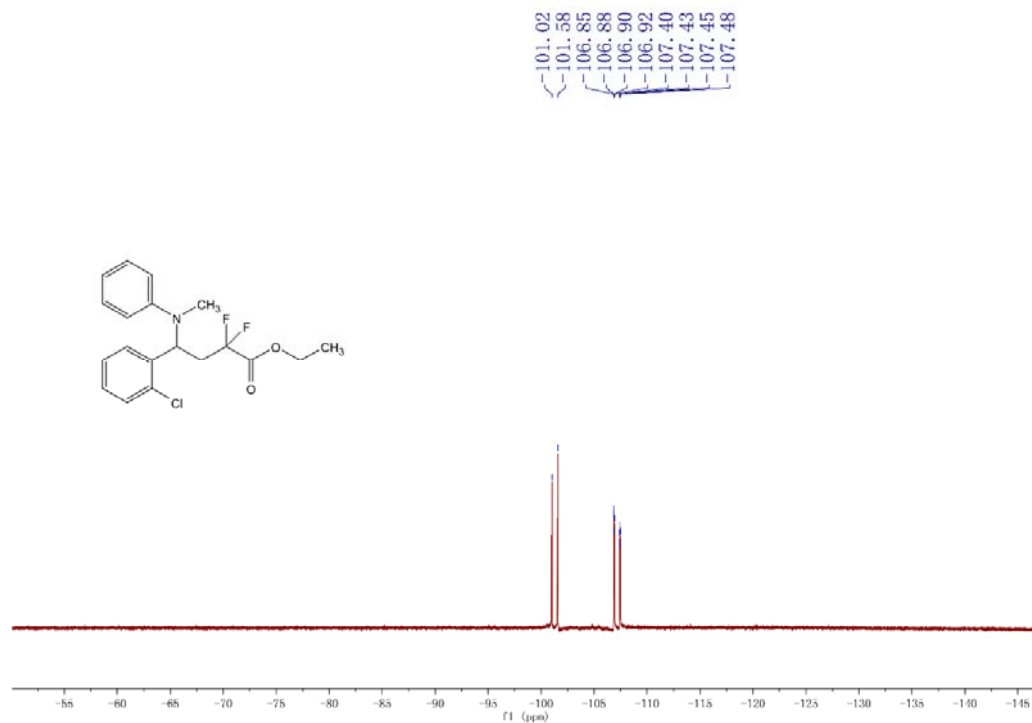

<sup>19</sup>F NMR of **4m**

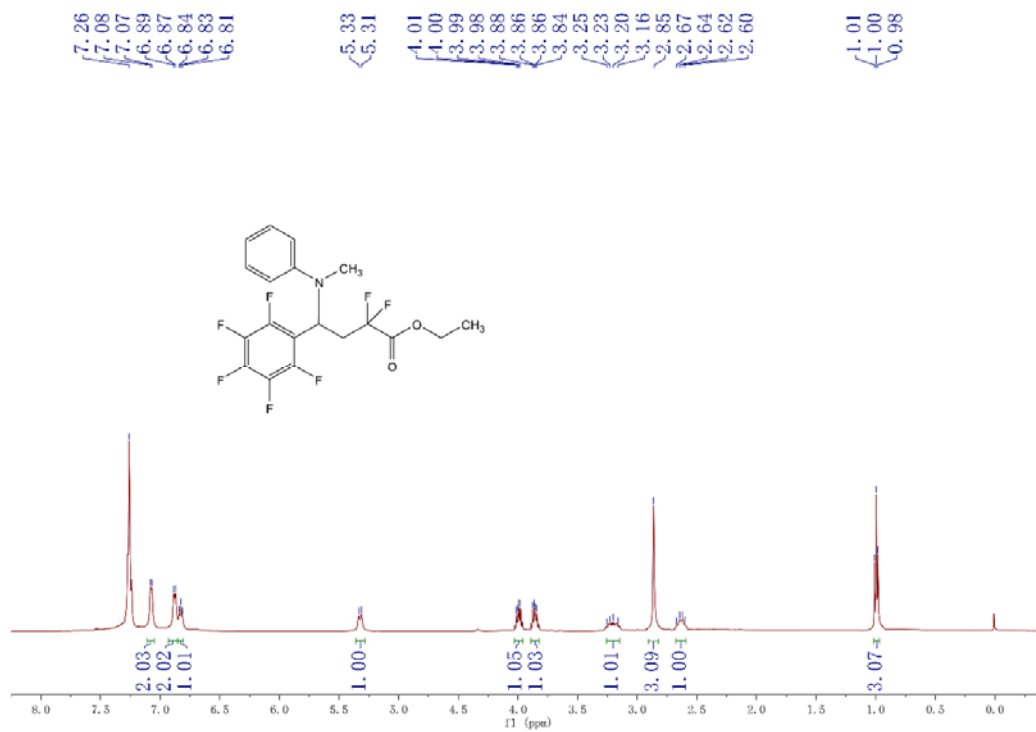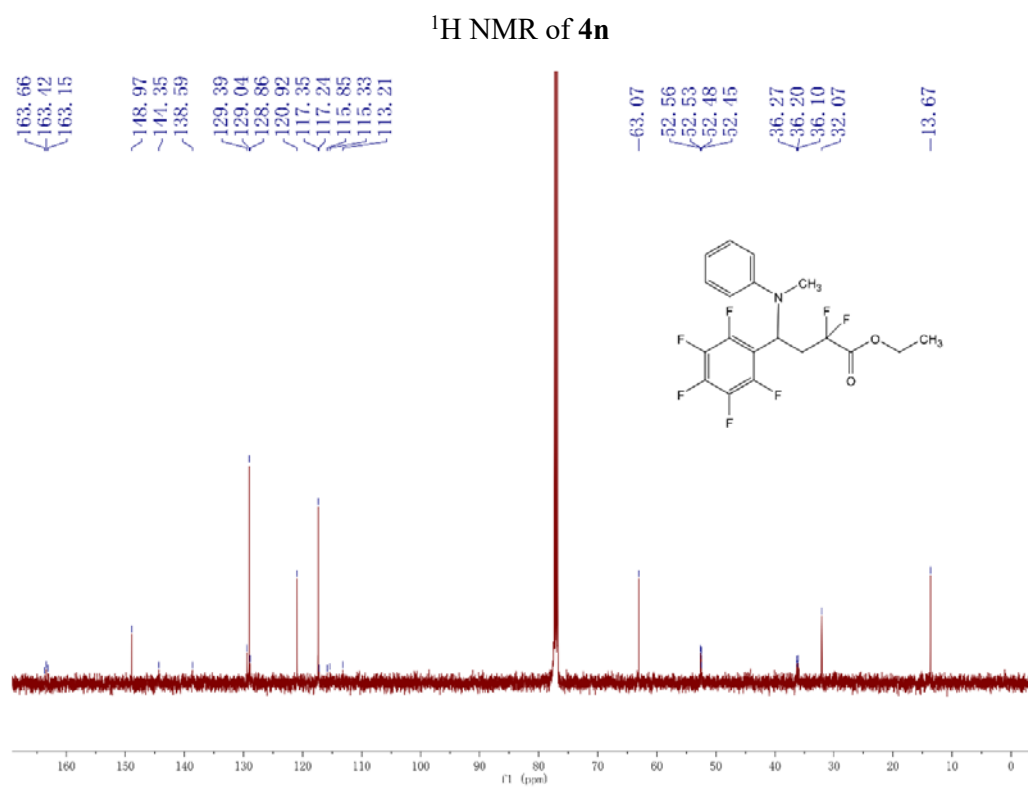



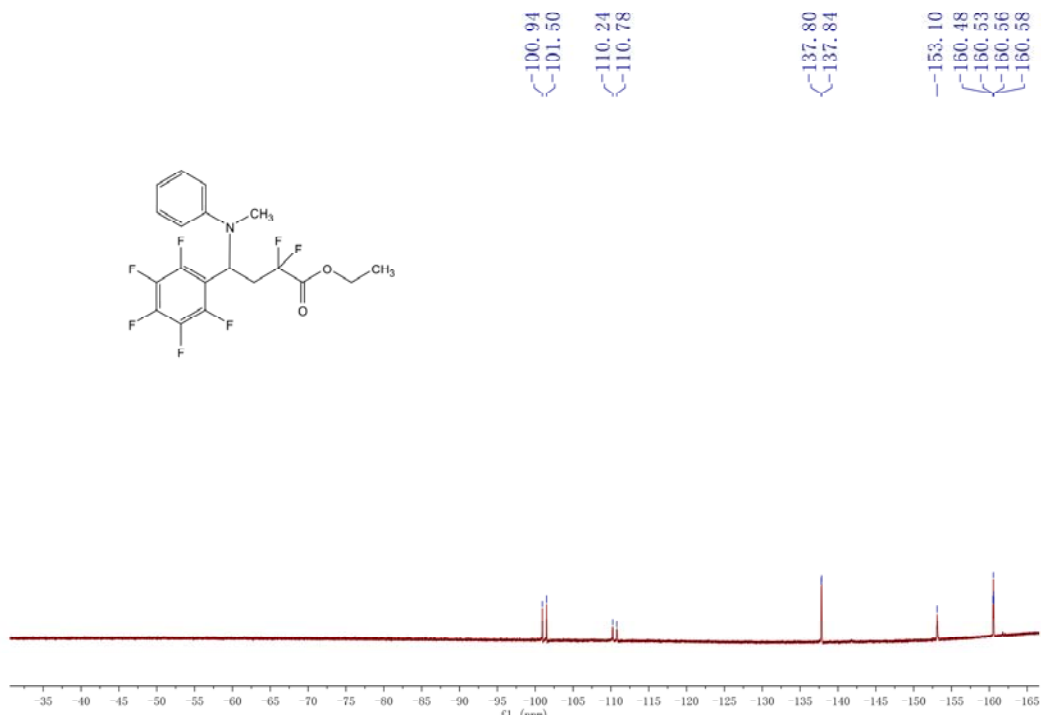

$^{19}\text{F}$  NMR of 4n

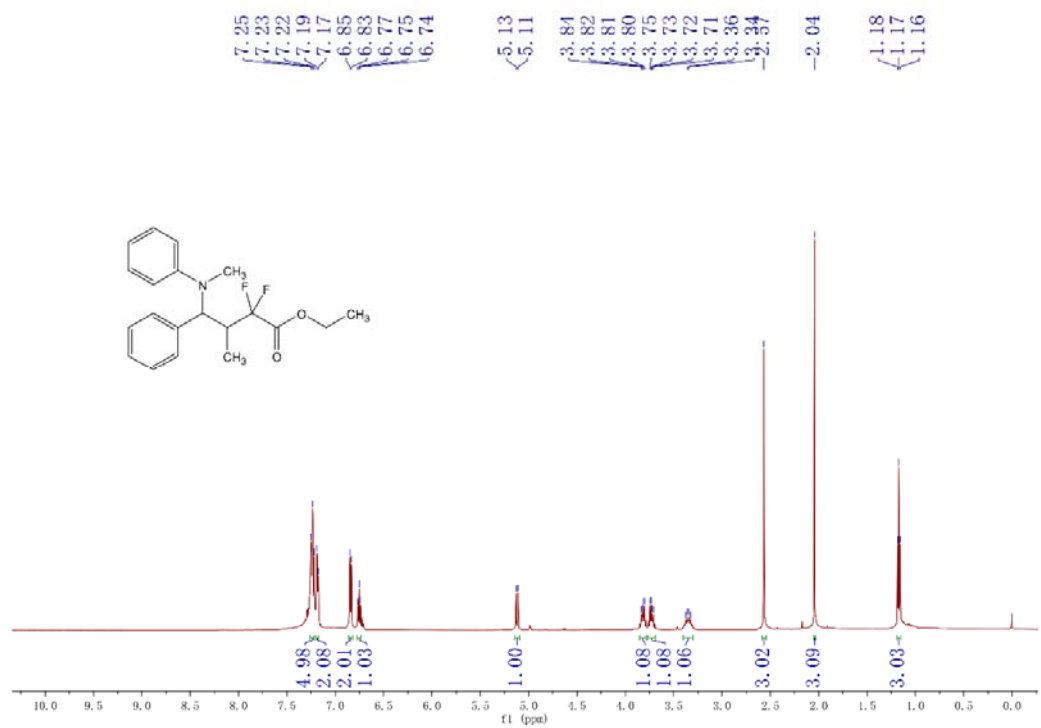

$^1\text{H}$  NMR of 4p

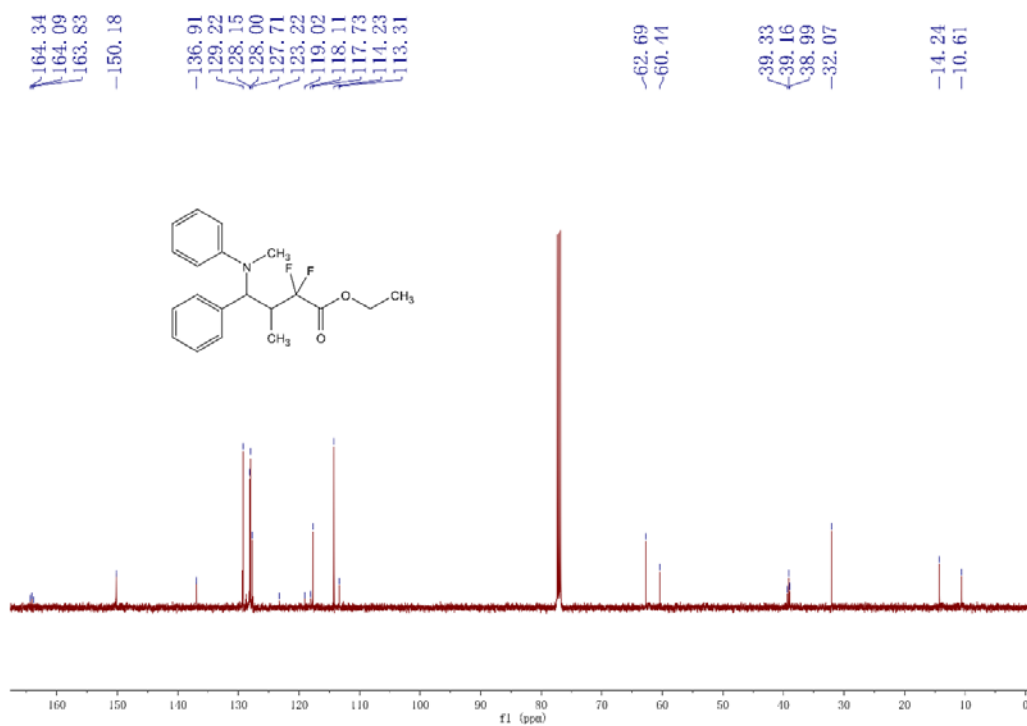

<sup>13</sup>C NMR of **4p**

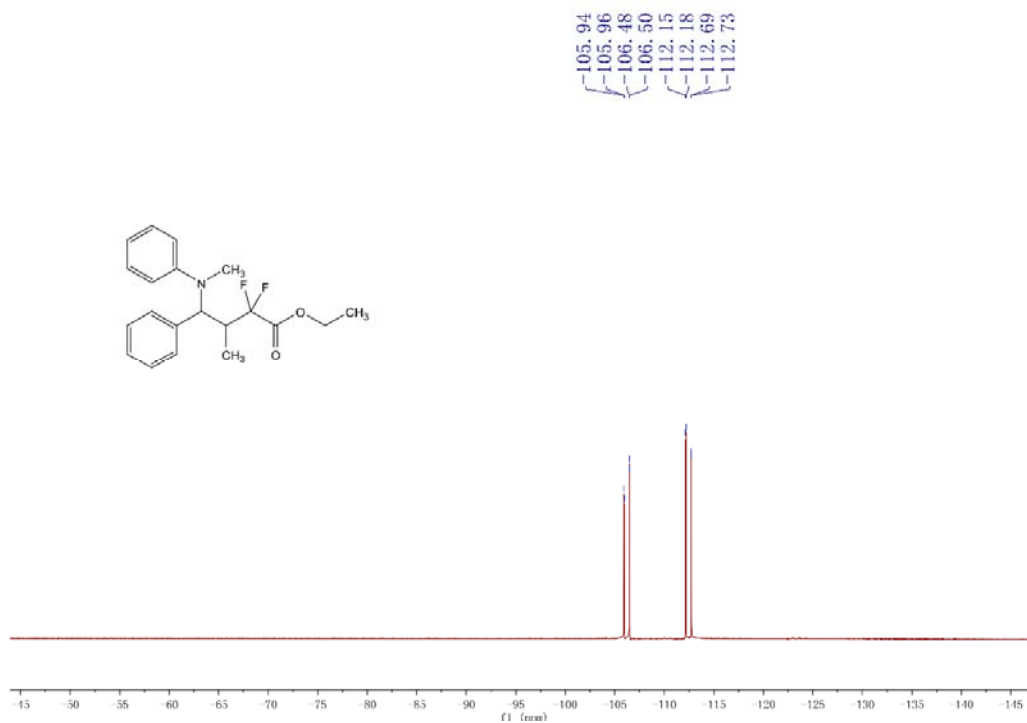

<sup>19</sup>F NMR of **4p**

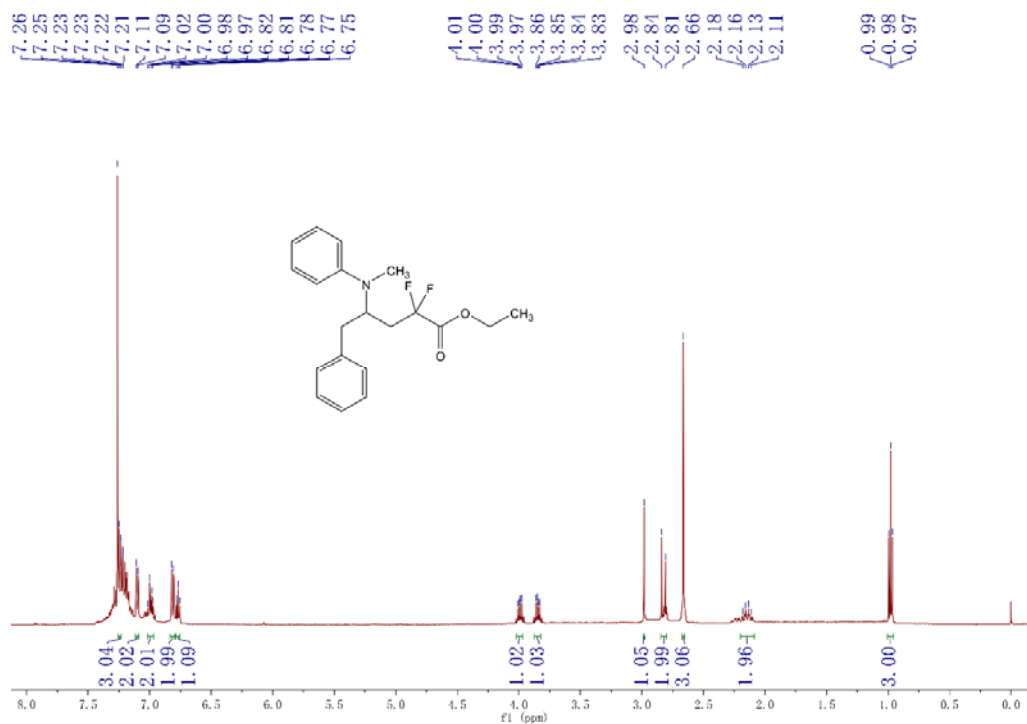

<sup>1</sup>H NMR of 4q

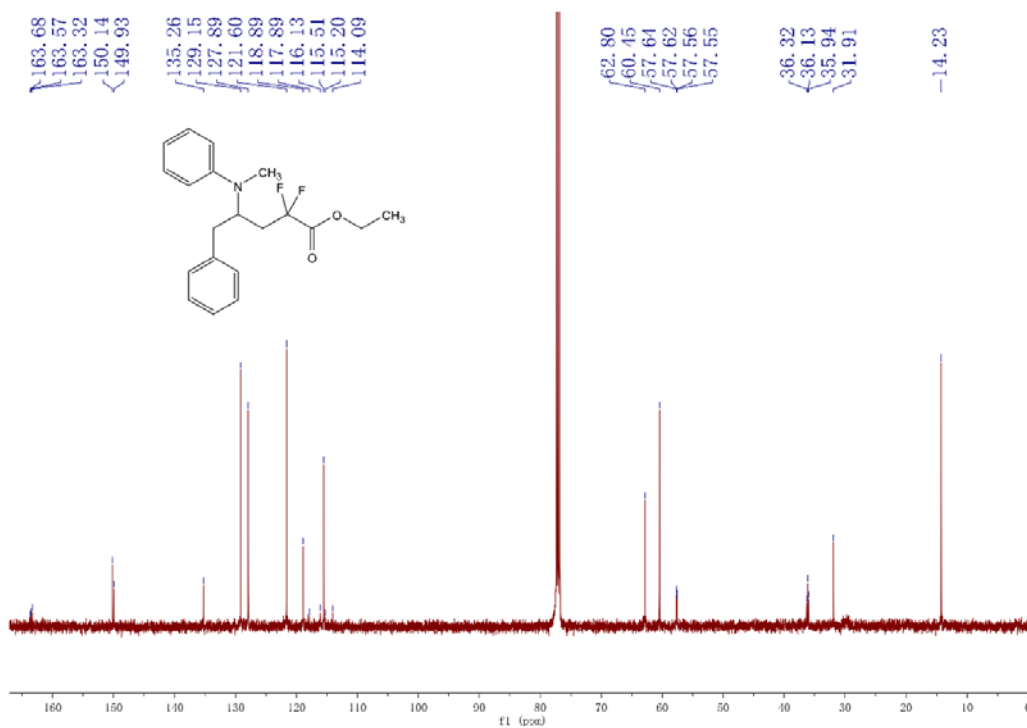

<sup>13</sup>C NMR of 4q

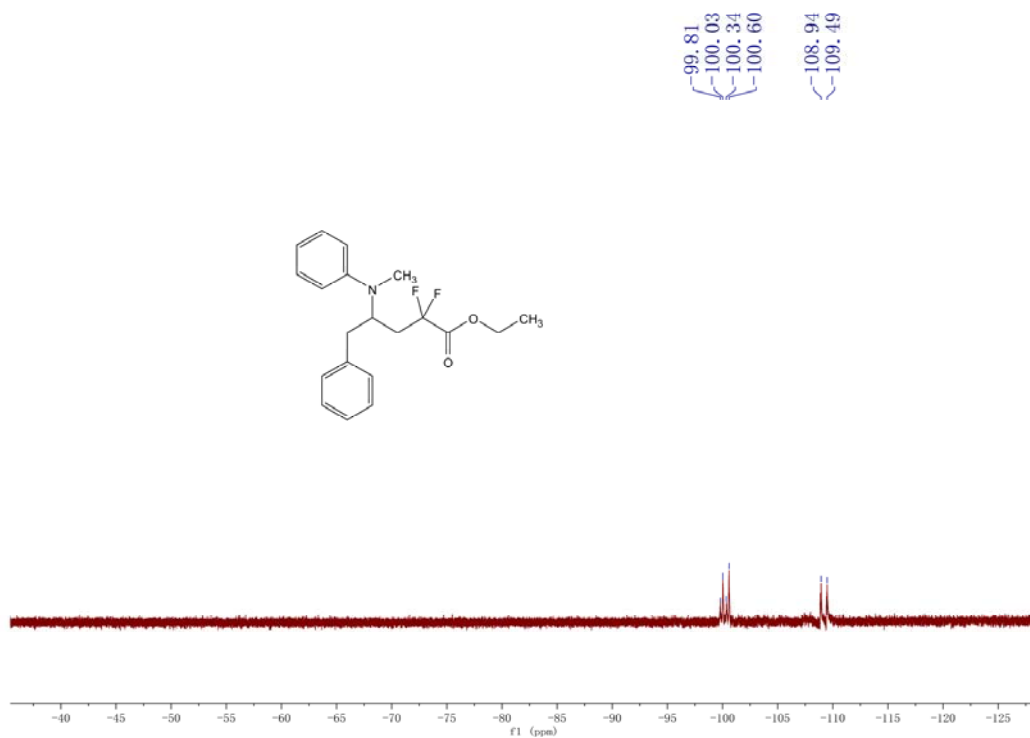

$^{19}\text{F}$  NMR of **4q**

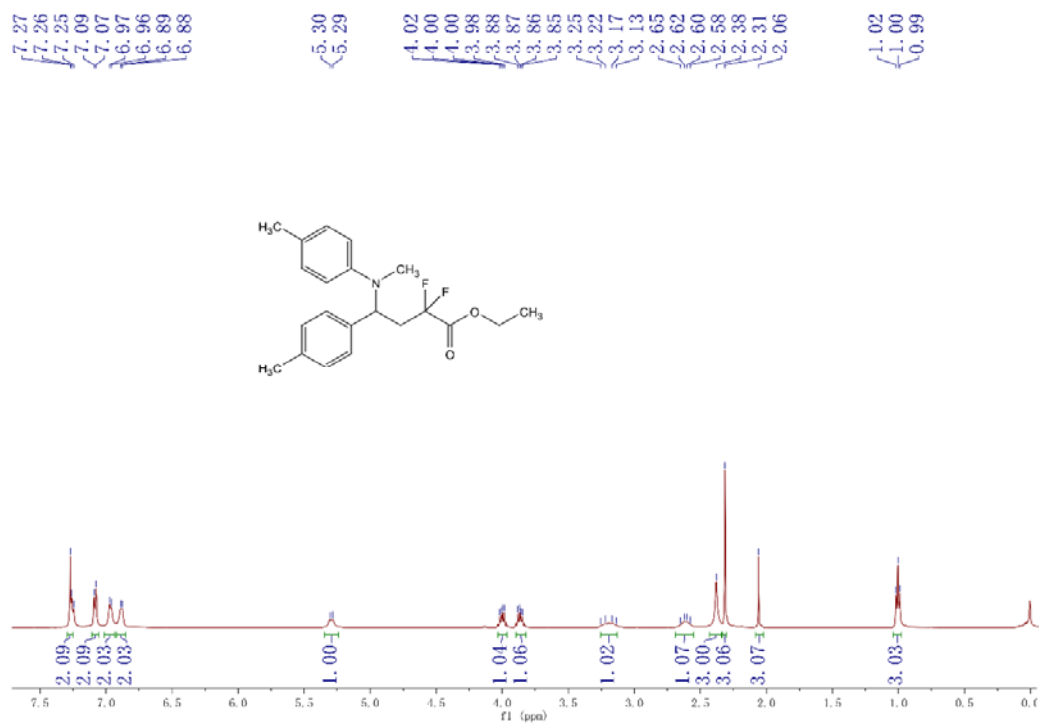

$^1\text{H}$  NMR of **4s**

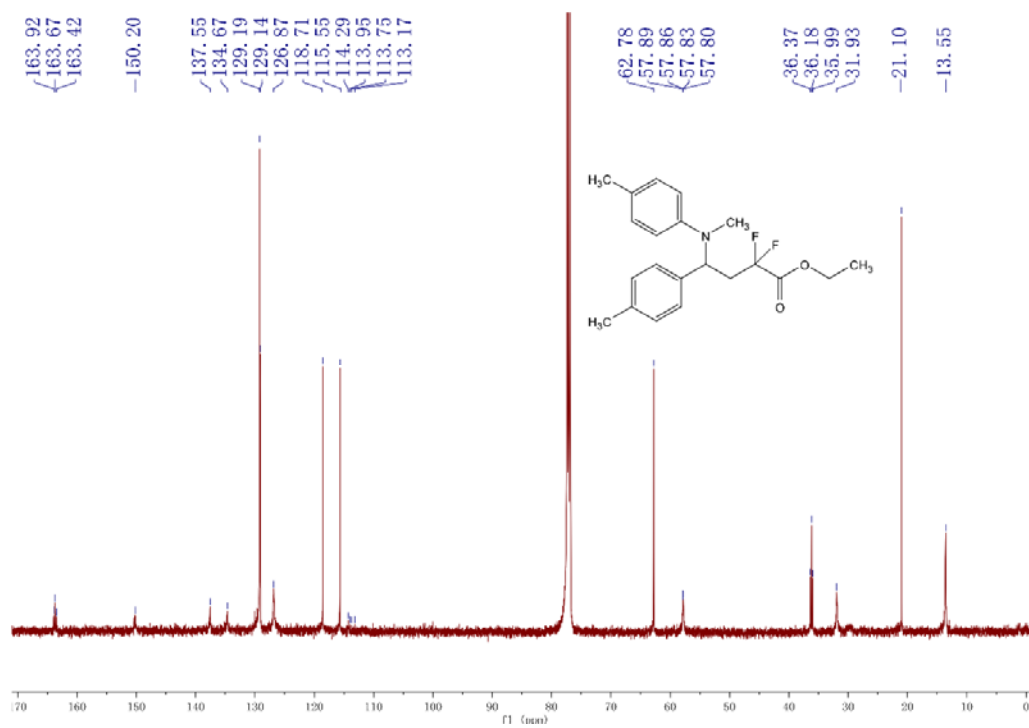

<sup>13</sup>C NMR of 4s

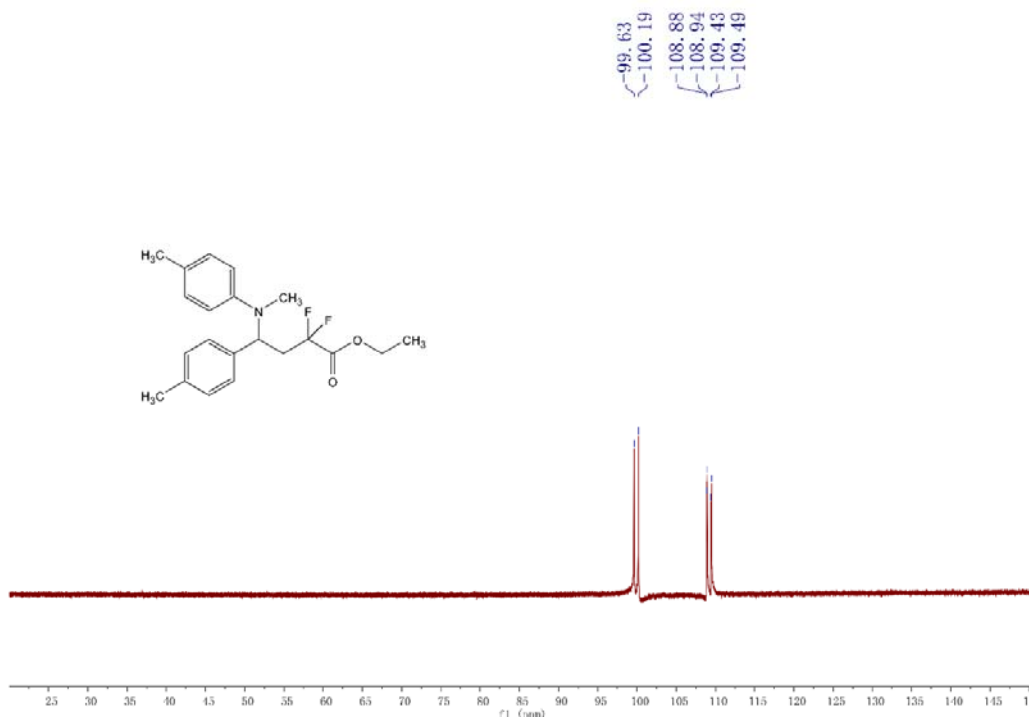

<sup>19</sup>F NMR of 4s

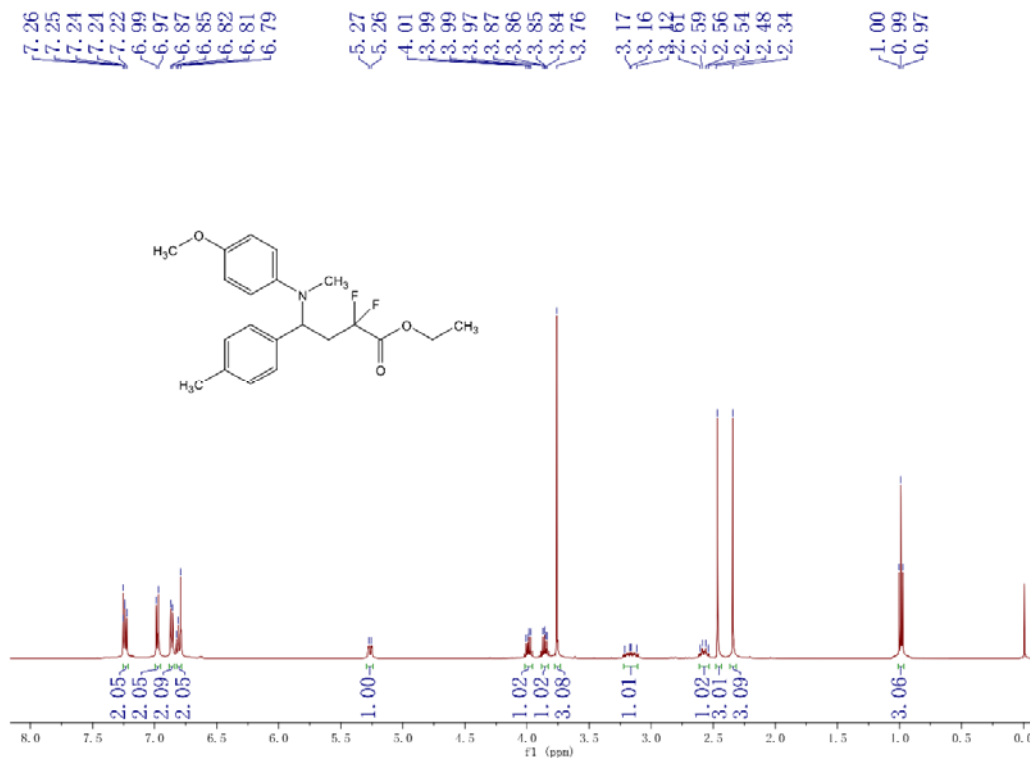

<sup>1</sup>H NMR of 4t

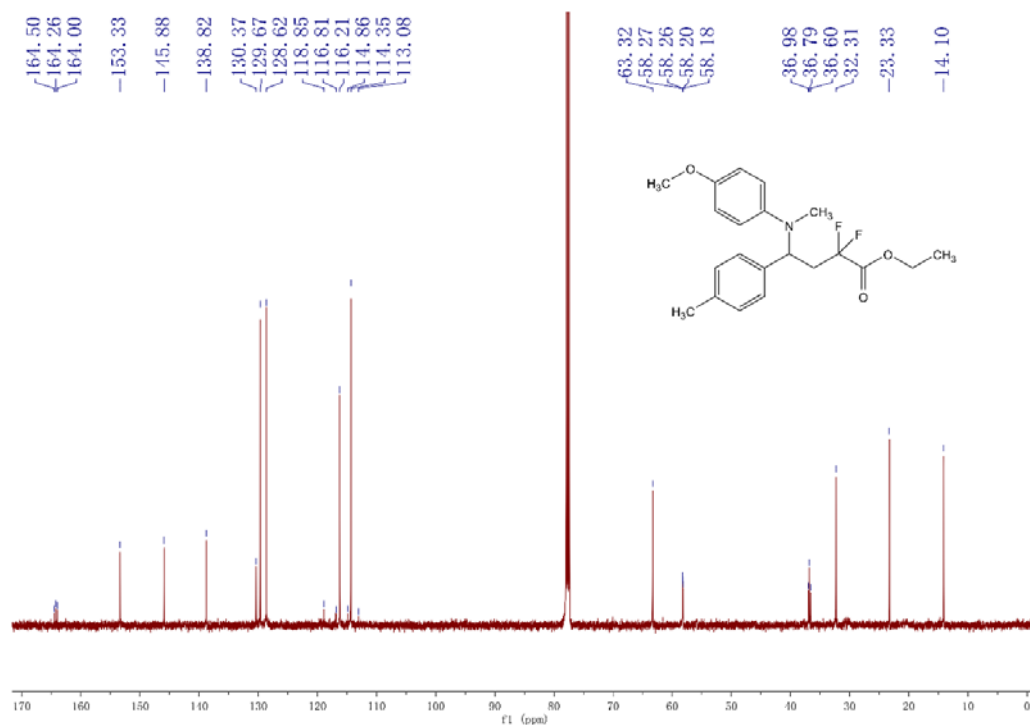

<sup>13</sup>C NMR of 4t

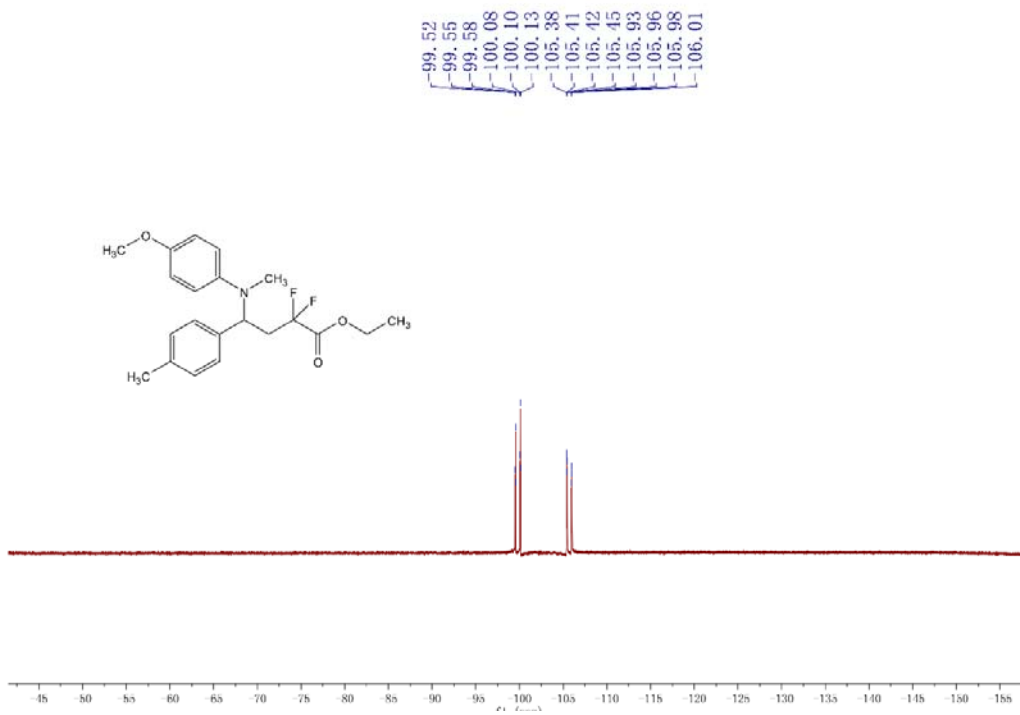

$^{19}\text{F}$  NMR of **4t**

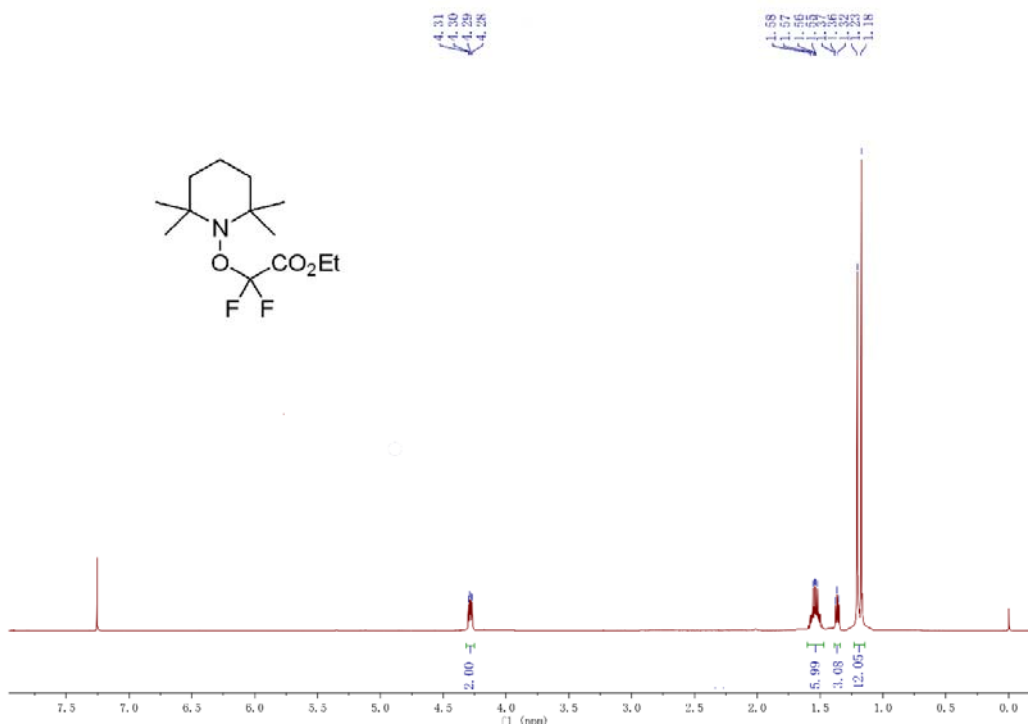

$^1\text{H}$  NMR of **5**

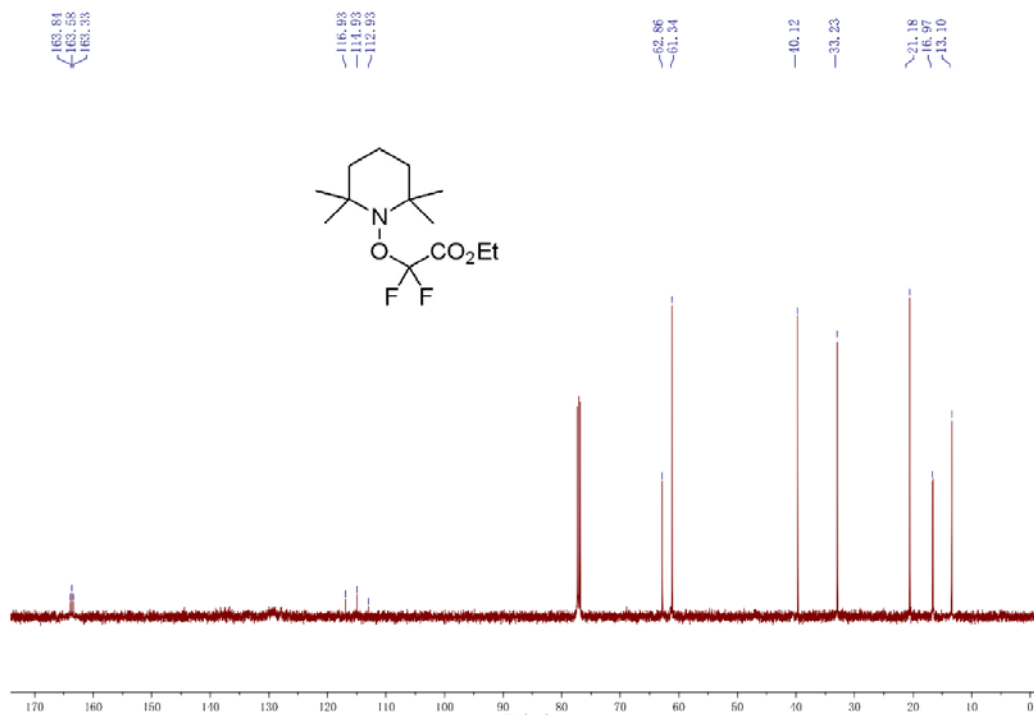

<sup>13</sup>C NMR of **5**

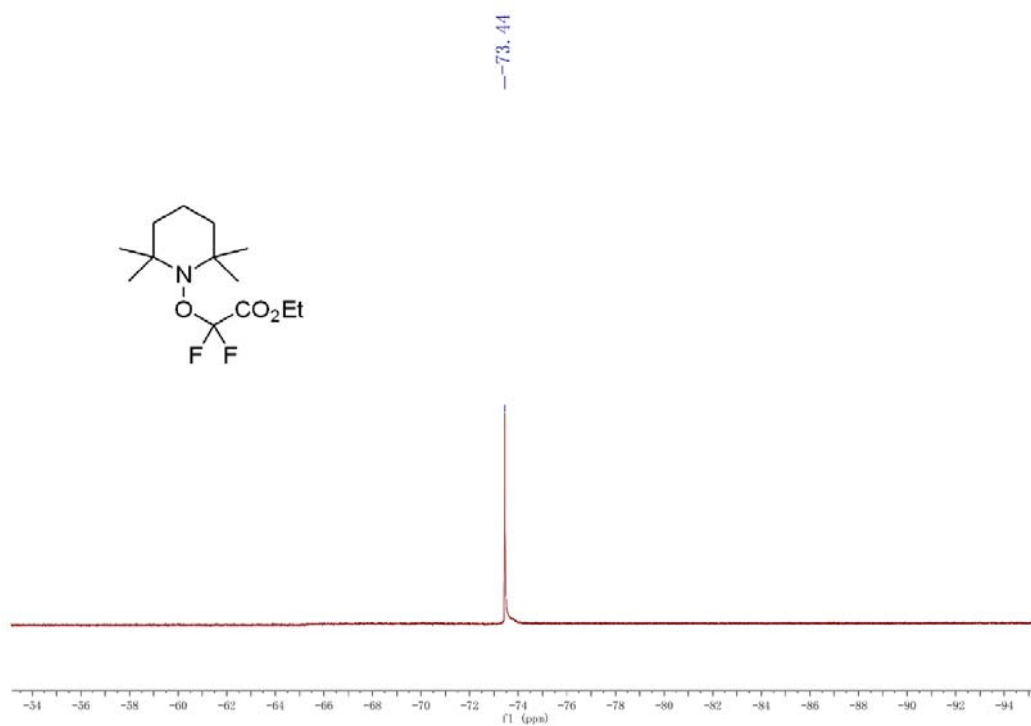

<sup>19</sup>F NMR of **5**
